# Supplementary material for: Janus Kinase Inhibitors for Alopecia Areata: A Systematic Review and Meta-Analysis
Source: PubMed Central journal article supplement (PMC10300710; doi:10.1001/jamanetworkopen.2023.20351), 2023-06-27

## Supplemental Online Content

Liu M, Gao Y, Yuan Y, et al. Janus kinase inhibitors for alopecia areata: a systematic review and meta-analysis. *JAMA Netw Open*. 2023;6(6):e2320351. doi:10.1001/jamanetworkopen.2023.20351

**eAppendix 1.** Search Strategy for Each Database

**eTable 1.** Inclusion and Exclusion Criteria of Patients With AA in Each RCTs

**eTable 2.** Risk of Bias for Each Included RCTs

**eAppendix 2.** Detail of Subgroup Analysis

**eTable 3.** Credibility Assessment of Subgroup Analysis

**eFigure 1.** Subgroup Analysis by Route of Administration of JAK Inhibitors Versus Placebo on Change From Baseline of SALT Scores

**eFigure 2.** Subgroup Analysis by Different Drugs of JAK Inhibitors Versus Placebo on Change From Baseline of SALT Scores

**eFigure 3.** Subgroup Analysis by Route of Administration of JAK Inhibitors Versus Placebo on SALT 50

**eFigure 4.** Subgroup Analysis by Different Drugs of JAK Inhibitors Versus Placebo on SALT 50

**eFigure 5.** Subgroup Analysis by Route of Administration of JAK Inhibitors Versus Placebo on SALT 90

**eFigure 6.** Subgroup Analysis by Different Drugs of JAK Inhibitors Versus Placebo on SALT 90

**eFigure 7.** Subgroup Analysis by Different Drugs of JAK Inhibitors Versus Placebo on SALT Score  $\leq 20$

**eFigure 8.** Subgroup Analysis by Route of Administration of JAK Inhibitors Versus Placebo on Treatment-related Adverse Event

**eFigure 9.** Subgroup Analysis by Different Drugs of JAK Inhibitors Versus Placebo on Treatment-related Adverse Event

**eFigure 10.** Subgroup Analysis by Route of Administration of JAK Inhibitors Versus

Placebo on Severe Adverse Event

**eFigure 11.** Subgroup Analysis by Different Drugs of JAK Inhibitors Versus Placebo on Severe Adverse Event

**eFigure 12.** Subgroup Analysis by Route of Administration of JAK Inhibitors Versus Placebo on Discontinuation Due to Adverse Event

**eFigure 13.** Subgroup Analysis by Different Drugs of JAK Inhibitors Versus Placebo on Discontinuation Due to Adverse Event

**eFigure 14.** Sensitivity Analysis for Change From Baseline of SALT Scores Used the DerSimonian-Laird Random Effect Model

**eFigure 15.** Sensitivity Analysis for SALT Scores (SALT 50, SALT 90, SALT Score  $\leq$  10 and SALT Score  $\leq$  20) Used the DerSimonian-Laird Random Effect Model

**eFigure 16.** Sensitivity Analysis for Safety Used the DerSimonian-Laird Random Effect Model

**eFigure 17.** Sensitivity Analysis for Change From Baseline of SALT Scores After Excluded High Risk Bias of Studies

**eFigure 18.** Sensitivity Analysis for SALT Scores (SALT 50, SALT 90, SALT Score  $\leq$  10 and SALT Score  $\leq$  20) After Excluded High Risk Bias of Studies

**eFigure 19.** Sensitivity Analysis for Safety After Excluded High Risk Bias of Studies

**eFigure 20.** Sensitivity Analysis for SALT Scores (SALT 50, SALT 90, SALT Score  $\leq$  10 and SALT Score  $\leq$  20) After Excluded Zero-Events Studies

**eFigure 21.** Sensitivity Analysis for Safety After Excluded Zero-Events Studies

This supplemental material has been provided by the authors to give readers additional information about their work.

## **eAppendix 1: Search strategy for each database**

### **Ovid MEDLIAN(R) ALL [1946 to Present]**

1 exp alopecia areata/

2 (alopecia areata or alopecia circumscripta or alopecia totalis or alopecia universalis or alopecia celsi or pelade\* or nonscarring hair loss or scarring hair loss).mp.

3 1 or 2

4 exp Janus Kinase Inhibitors/

5 (janus kinase inhibitors or janus kinase inhibitor or JAK Inhibitors or JAK inhibitor).mp.

6 exp ruxolitinib/

7 (ruxolitinib\* or INCB-18424 or INCB018424 or INCB-018424 or INC-424 or INC424 or INCA24).mp.

8 exp tofacitinib/

9 (tofacitinib\* or Xeljanz or CP 690,550 or CP 690550 or CP690550 or CP-690550 or CP-690,550).mp.

10 exp delgocitinib/

11 (baracitinib\* or baricitinib\* or delgocitinib\* or ritlecitinib\* or brepocitinib\* or CTP-543).mp.

12 or/4-7

13 3 and 12

14 randomized controlled trial.pt.

15 controlled clinical trial.pt.

16 randomized.ab.

17 placebo.ab.

18 rug therapy.fs.

19 randomly.ab.

20 trial.ti.

21 groups.ab.

22 or/14-21

23 (animals not (humans and animals)).sh.

24 22 not 23

25 13 and 24

**EMBASE[1974 to August 2022]**

1 exp alopecia areata/

2 (alopecia areata or alopecia circumscripta or alopecia totalis or alopecia universalis or alopecia celsi or pelade\* or nonscarring hair loss or scarring hair loss).mp.

3 1 or 2

4 exp Janus Kinase Inhibitors/

5 (janus kinase inhibitors or janus kinase inhibitor or JAK Inhibitors or JAK inhibitor).mp.

6 exp ruxolitinib/

7 (ruxolitinib\* or INCB-18424 or INCB018424 or INCB-018424 or INC-424 or INC424 or INCA24).mp.

8 exp tofacitinib/

9 (tofacitinib\* or Xeljanz or CP 690,550 or CP 690550 or CP690550 or CP-690550 or CP-690,550).mp.

10 exp delgocitinib/

11 (baracitinib\* or baricitinib\* or delgocitinib\* or ritlecitinib\* or brepocitinib\* or CTP-543).mp.

12 or/4-7

13 3 and 12

14 Randomized controlled trial/

15 Controlled clinical study/

16 random\$.ti,ab.

17 randomization/

18 intermethod comparison/

19 placebo.ti,ab.

20 (compare or compared or comparison).ti.

21 ((evaluated or evaluate or evaluating or assessed or assess) and (compare or

compared or comparing or comparison)).ab.  
22 (open adj label).ti,ab.  
23 ((double or single or double or singly) adj (blind or blinded or blindly)).ti,ab.  
24 double blind procedure/  
25 parallel group\$1.ti,ab.  
26 (crossover or cross over).ti,ab.  
27 ((assign\$ or match or matched or allocation) adj5 (alternate or group\$1 or intervention\$1 or patient\$1 or subject\$1 or participant\$1)).ti,ab.  
28 (assigned or allocated).ti,ab.  
29 (controlled adj7 (study or design or trial)).ti,ab.  
30 (volunteer or volunteers).ti,ab.  
31 human experiment/  
32 trial.ti.  
33 or/14-32  
34 (random\$ adj sampl\$ adj7 ("cross section\$" or questionnaire\$1 or survey\$ or database\$1)).ti,ab. not (comparative study/ or controlled study/ or randomi?ed controlled.ti,ab. or randomly assigned.ti,ab.)  
35 Cross-sectional study/ not (randomized controlled trial/ or controlled clinical study/ or controlled study/ or randomi?ed controlled.ti,ab. or control group\$1.ti,ab.)  
36 (((case adj control\$) and random\$) not randomi?ed controlled).ti,ab.  
37 (Systematic review not (trial or study)).ti.  
38 (nonrandom\$ not random\$).ti,ab.  
39 "Random field\$".ti,ab.  
40 (random cluster adj3 sampl\$).ti,ab.  
41 (review.ab. and review.pt.) not trial.ti.  
42 "we searched".ab. and (review.ti. or review.pt.)  
43 "update review".ab.  
44 (databases adj4 searched).ab.  
45 (rat or rats or mouse or mice or swine or porcine or murine or sheep or lambs or

pigs or piglets or rabbit or rabbits or cat or cats or dog or dogs or cattle or bovine or monkey or monkeys or trout or marmoset\$1).ti. and animal experiment/

46 Animal experiment/ not (human experiment/ or human/)

47 or/34-46

48 54 not 47

49 13 and 33 and 48

### **Cochrane Controlled Register of Trials**

1 exp alopecia areata/

2 (alopecia areata or alopecia circumscripta or alopecia totalis or alopecia universalis or alopecia celsi or pelade\* or nonscarring hair loss or scarring hair loss).mp.

3 1 or 2

4 exp Janus Kinase Inhibitors/

5 (janus kinase inhibitors or janus kinase inhibitor or JAK Inhibitors or JAK inhibitor).mp.

6 exp ruxolitinib/

7 (ruxolitinib\* or INCB-18424 or INCB018424 or INCB-018424 or INC-424 or INC424 or INCA24).mp.

8 exp tofacitinib/

9 (tofacitinib\* or Xeljanz or CP 690,550 or CP 690550 or CP690550 or CP-690550 or CP-690,550).mp.

10 exp delgocitinib/

11 (baracitinib\* or baricitinib\* or delgocitinib\* or ritlecitinib\* or brepocitinib\* or CTP-543).mp.

12 or/4-7

13 3 and 12

**eTable 1. Inclusion and exclusion criteria of patients with AA in each RCTs**

| Author, year   | Inclusion criteria                                                                                                                                                                                                                                                                                                                                                                                                                                                                                                                                                                                                                      | Exclusion criteria                                                                                                                                                                                                                                                                                                                                                                                                                                                                                                                                                                                                                                                                                                                                                                  |
|----------------|-----------------------------------------------------------------------------------------------------------------------------------------------------------------------------------------------------------------------------------------------------------------------------------------------------------------------------------------------------------------------------------------------------------------------------------------------------------------------------------------------------------------------------------------------------------------------------------------------------------------------------------------|-------------------------------------------------------------------------------------------------------------------------------------------------------------------------------------------------------------------------------------------------------------------------------------------------------------------------------------------------------------------------------------------------------------------------------------------------------------------------------------------------------------------------------------------------------------------------------------------------------------------------------------------------------------------------------------------------------------------------------------------------------------------------------------|
| King 2021a     | Adults at least 18 years of age qualified for inclusion if they had AA with $\geq 50\%$ scalp hair loss, no hair regrowth within 6 months of the screening and baseline visits, and a current episode of fixed hair loss of 7 years or less in duration.                                                                                                                                                                                                                                                                                                                                                                                | Patients were excluded if they had another type of alopecia or active inflammatory disease involving the scalp, or if they used an oral or topical JAK inhibitor within 12 weeks of the first dose of the study drug, a biologic within 12 weeks or 5 half-lives (whichever is longer), systemic or intralesional treatment that could affect AA within 8 weeks or 5 half-lives, phototherapy within 4 weeks, or a topical treatment that could affect AA within 2 weeks.                                                                                                                                                                                                                                                                                                           |
| Olsen 2019     | Patients aged 18 through 70 years with a severity of alopecia tool score at baseline of 25% to 99% scalp hair loss and either a positive hair pull test or presence of exclamation mark hairs. The washout periods for all agents used to treat AA was 7 days before baseline for over-the-counter, nonprescription medications and 14 days for any prescription medications.                                                                                                                                                                                                                                                           | Key exclusion criteria included AT, AU, or exclusively ophiasis; less than 12 months of 25% to less than 50% hair loss and less than 6 months of 50% to 99% hair loss; evidence of diffuse, spontaneous terminal hair regrowth; history of spontaneous remission in the previous 2 years; and cytopenias at screening.                                                                                                                                                                                                                                                                                                                                                                                                                                                              |
| Mikhaylov 2022 | Age ranged from 18 to 65 years, no restrictions on gender. Subjects must have signed and dated informed consent after receiving verbal and written information about the clinical trial. Subjects with unequivocal clinical diagnosis of moderate to severe scalp alopecia areata (patch type, totalis, universalis), as determined by the (sub) investigator, affecting a minimum of 30% scalp area at Visit 1 (Screening) and Visit 2 (Day 1, baseline); 3. Minimum 6 month duration of hair loss at Visit 1 (Screening). No upper limit time limit. Subject must accept to not cut hair in the treated scalp areas during the trial. | Females who are pregnant or are breast feeding. Current signs of spontaneous hair regrowth. Diffuse type alopecia areata. Co-existing moderate to severe androgenic alopecia (Norwood-Hamilton stage IV-VI and Ludwig stage II and III). Subjects with changed or expected changes in medication for thyroid disease within 6 month before Visit 1 (screening) or during the trial. Systemic treatment with immunosuppressive drugs (e.g., methotrexate, cyclosporine, azathioprine), chloroquin derivatives, corticosteroids, or any other systemic therapy that in the opinion of the investigator could affect hair regrowth, within 6 weeks prior to randomization (inhaled or intra-nasal steroids corresponding to up to 1 mg prednisone for asthma or rhinitis may be used). |

|                         |                                                                                                                                                                                                                                                                                                                                                                                                                                                                                                                                                                                                                                                                                                                                                                             |                                                                                                                                                                                                                                                                                                                                                                                                    |
|-------------------------|-----------------------------------------------------------------------------------------------------------------------------------------------------------------------------------------------------------------------------------------------------------------------------------------------------------------------------------------------------------------------------------------------------------------------------------------------------------------------------------------------------------------------------------------------------------------------------------------------------------------------------------------------------------------------------------------------------------------------------------------------------------------------------|----------------------------------------------------------------------------------------------------------------------------------------------------------------------------------------------------------------------------------------------------------------------------------------------------------------------------------------------------------------------------------------------------|
| King 2022a              | 18 and 65 years of age and were experiencing current episodes of hair loss because of AA lasting $\geq 6$ months and not exceeding 10 years. The patients had $\geq 50\%$ hair loss, as measured by the Severity of Alopecia Tool (SALT), at screening and baseline and were not concurrently being treated for AA or receiving other treatments that might have affected hair regrowth or immune responses.                                                                                                                                                                                                                                                                                                                                                                | Patients were excluded if they had received any systemic immunosuppressive medications (eg, methotrexate, cyclosporin, JAK inhibitors, etc.) within 3 months of screening or any biologic medications (eg., adalimumab or ustekinumab) within 6 months of screening.                                                                                                                               |
| King 2021b              | Eligibility criteria included patients aged $\geq 18$ years to $\leq 60$ years for males and $\geq 18$ years to $\leq 70$ years for females with severe (Severity of Alopecia Tool [SALT] score of 50-94% scalp hair loss) or very severe AA (SALT score 95-100%). Male or nonpregnant, nonbreastfeeding female participants.                                                                                                                                                                                                                                                                                                                                                                                                                                               | Primarily "diffuse" type of AA. Are currently experiencing other forms of alopecia or any other concomitant conditions that would interfere with evaluations of the effect of study medication on AA. Previously treated with an oral Janus kinase (JAK) inhibitor and had an inadequate response (for example, absence of significant terminal hair growth after at least 12 weeks of treatment). |
| King 2022b<br>BRAVE-AA1 | Eligibility criteria included patients aged $\geq 18$ years to $\leq 60$ years for males and $\geq 18$ years to $\leq 70$ years for females with severe (Severity of Alopecia Tool [SALT] score of 50-94% scalp hair loss) or very severe AA (SALT score 95-100%). Male or nonpregnant, nonbreastfeeding female participants.                                                                                                                                                                                                                                                                                                                                                                                                                                               | Primarily "diffuse" type of AA. Are currently experiencing other forms of alopecia or any other concomitant conditions that would interfere with evaluations of the effect of study medication on AA. Previously treated with an oral Janus kinase (JAK) inhibitor and had an inadequate response (for example, absence of significant terminal hair growth after at least 12 weeks of treatment). |
| King 2022b<br>BRAVE-AA2 | Are at least 18 years and $\leq 60$ years for males ( $\leq 70$ years of age for females) at the time of informed consent. Have severe or very severe AA, as determined by all of the following: Current AA episode of more than 6 months' duration and hair loss encompassing $\geq 50\%$ of the scalp, as measured by SALT (AA-IGA of 3 or 4) at screening and baseline; No spontaneous improvement over the past 6 months; Current episode of severe or very severe AA of less than 8 years. Note: participants who have severe or very severe AA for $\geq 8$ years may be enrolled if episodes of regrowth, spontaneous or under treatment, have been observed on the affected areas over the past 8 years. Male or nonpregnant, nonbreastfeeding female participants. | Primarily "diffuse" type of AA. Are currently experiencing other forms of alopecia or any other concomitant conditions that would interfere with evaluations of the effect of study medication on AA. Previously treated with an oral Janus kinase (JAK) inhibitor and had an inadequate response (for example, absence of significant terminal hair growth after at least 12 weeks of treatment). |





**eTable 2. Risk of bias for each included RCTs**

| Study      | Outcome                              | Random sequence generation | Allocation concealment | Blinding of patients | Blinding of health care providers | Blinding of data collectors | Blinding of outcome assessors/ adjudicators | Blinding of data analysts | Incomplete outcome data | Selective outcome reporting | Other bias     |
|------------|--------------------------------------|----------------------------|------------------------|----------------------|-----------------------------------|-----------------------------|---------------------------------------------|---------------------------|-------------------------|-----------------------------|----------------|
| King 2021a | SALT 30                              | Definitely Low             | Definitely Low         | Definitely Low       | Definitely Low                    | Definitely Low              | Definitely Low                              | Definitely Low            | Probably High           | Probably Low                | Definitely Low |
| King 2021a | SALT 50                              | Definitely Low             | Definitely Low         | Definitely Low       | Definitely Low                    | Definitely Low              | Definitely Low                              | Definitely Low            | Probably High           | Probably Low                | Definitely Low |
| King 2021a | SALT 90                              | Definitely Low             | Definitely Low         | Definitely Low       | Definitely Low                    | Definitely Low              | Definitely Low                              | Definitely Low            | Probably High           | Probably Low                | Definitely Low |
| King 2021a | Severe adverse event                 | Definitely Low             | Definitely Low         | Definitely Low       | Definitely Low                    | Definitely Low              | Definitely Low                              | Definitely Low            | Probably High           | Probably Low                | Definitely Low |
| King 2021a | Discontinuation due to Adverse Event | Definitely Low             | Definitely Low         | Definitely Low       | Definitely Low                    | Definitely Low              | Definitely Low                              | Definitely Low            | Probably High           | Probably Low                | Definitely Low |
| King 2021a | Change from baseline of SALT score   | Definitely Low             | Definitely Low         | Definitely Low       | Definitely Low                    | Definitely Low              | Definitely Low                              | Definitely Low            | Probably High           | Probably Low                | Definitely Low |
| Olsen 2019 | SALT 50                              | Probably Low               | Probably Low           | Definitely Low       | Definitely Low                    | Probably Low                | Probably Low                                | Probably Low              | Low                     | Probably Low                | Definitely Low |
| Olsen 2019 | SALT 90                              | Probably Low               | Probably Low           | Definitely Low       | Definitely Low                    | Probably Low                | Probably Low                                | Probably Low              | Low                     | Probably Low                | Definitely Low |
| Olsen 2019 | Treatment-related adverse event      | Probably Low               | Probably Low           | Definitely Low       | Definitely Low                    | Probably Low                | Probably Low                                | Probably Low              | Low                     | Probably Low                | Definitely Low |
| Olsen 2019 | Severe adverse event                 | Probably Low               | Probably Low           | Definitely Low       | Definitely Low                    | Probably Low                | Probably Low                                | Probably Low              | Low                     | Probably Low                | Definitely Low |

|                |                                      |                |                |                |                |                |                |                |      |                |                |
|----------------|--------------------------------------|----------------|----------------|----------------|----------------|----------------|----------------|----------------|------|----------------|----------------|
| Mikhaylov 2022 | SALT 50                              | Definitely Low | Definitely Low | Definitely Low | Definitely Low | Definitely Low | Definitely Low | Definitely Low | High | Low            | Definitely Low |
| Mikhaylov 2022 | Treatment-related adverse event      | Definitely Low | Definitely Low | Definitely Low | Definitely Low | Definitely Low | Definitely Low | Definitely Low | High | Low            | Definitely Low |
| Mikhaylov 2022 | Severe adverse event                 | Definitely Low | Definitely Low | Definitely Low | Definitely Low | Definitely Low | Definitely Low | Definitely Low | High | Low            | Definitely Low |
| Mikhaylov 2022 | Change from baseline of SALT score   | Definitely Low | Definitely Low | Definitely Low | Definitely Low | Definitely Low | Definitely Low | Definitely Low | High | Low            | Definitely Low |
| King 2022a     | SALT 50                              | Probably Low   | Probably Low   | Definitely Low | Definitely Low | Probably Low   | Probably Low   | Probably Low   | Low  | Probably Low   | Definitely Low |
| King 2022a     | SALT score $\leq 20$                 | Probably Low   | Probably Low   | Definitely Low | Definitely Low | Probably Low   | Probably Low   | Probably Low   | Low  | Probably Low   | Definitely Low |
| King 2022a     | Treatment-related adverse event      | Probably Low   | Probably Low   | Definitely Low | Definitely Low | Probably Low   | Probably Low   | Probably Low   | Low  | Probably Low   | Definitely Low |
| King 2022a     | Severe adverse event                 | Probably Low   | Probably Low   | Definitely Low | Definitely Low | Probably Low   | Probably Low   | Probably Low   | Low  | Probably Low   | Definitely Low |
| King 2022a     | Discontinuation due to Adverse Event | Probably Low   | Probably Low   | Definitely Low | Definitely Low | Probably Low   | Probably Low   | Probably Low   | Low  | Probably Low   | Definitely Low |
| King 2021b     | SALT 30                              | Definitely Low | Definitely Low | Definitely Low | Definitely Low | Probably Low   | Probably Low   | Probably Low   | Low  | Definitely Low | Definitely Low |
| King 2021b     | SALT 50                              | Definitely Low | Definitely Low | Definitely Low | Definitely Low | Probably Low   | Probably Low   | Probably Low   | Low  | Definitely Low | Definitely Low |
| King 2021b     | SALT 90                              | Definitely Low | Definitely Low | Definitely Low | Definitely Low | Probably Low   | Probably Low   | Probably Low   | Low  | Definitely Low | Definitely Low |
| King 2021b     | SALT score $\leq 20$                 | Definitely Low | Definitely Low | Definitely Low | Definitely Low | Probably Low   | Probably Low   | Probably Low   | Low  | Definitely Low | Definitely Low |

|                         |                                      |                |                |                |                |              |              |              |     |                |                |
|-------------------------|--------------------------------------|----------------|----------------|----------------|----------------|--------------|--------------|--------------|-----|----------------|----------------|
| King 2021b              | SALT score $\leq 10$                 | Definitely Low | Definitely Low | Definitely Low | Definitely Low | Probably Low | Probably Low | Probably Low | Low | Definitely Low | Definitely Low |
| King 2021b              | Treatment-related adverse event      | Definitely Low | Definitely Low | Definitely Low | Definitely Low | Probably Low | Probably Low | Probably Low | Low | Definitely Low | Definitely Low |
| King 2021b              | Severe adverse event                 | Definitely Low | Definitely Low | Definitely Low | Definitely Low | Probably Low | Probably Low | Probably Low | Low | Definitely Low | Definitely Low |
| King 2021b              | Change from baseline of SALT score   | Definitely Low | Definitely Low | Definitely Low | Definitely Low | Probably Low | Probably Low | Probably Low | Low | Definitely Low | Definitely Low |
| King 2022b<br>BRAVE-AA1 | SALT 90                              | Definitely Low | Definitely Low | Definitely Low | Definitely Low | Probably Low | Probably Low | Probably Low | Low | Probably Low   | Definitely Low |
| King 2022b<br>BRAVE-AA1 | SALT score $\leq 20$                 | Definitely Low | Definitely Low | Definitely Low | Definitely Low | Probably Low | Probably Low | Probably Low | Low | Probably Low   | Definitely Low |
| King 2022b<br>BRAVE-AA1 | SALT score $\leq 10$                 | Definitely Low | Definitely Low | Definitely Low | Definitely Low | Probably Low | Probably Low | Probably Low | Low | Probably Low   | Definitely Low |
| King 2022b<br>BRAVE-AA1 | Treatment-related adverse event      | Definitely Low | Definitely Low | Definitely Low | Definitely Low | Probably Low | Probably Low | Probably Low | Low | Probably Low   | Definitely Low |
| King 2022b<br>BRAVE-AA1 | Severe adverse event                 | Definitely Low | Definitely Low | Definitely Low | Definitely Low | Probably Low | Probably Low | Probably Low | Low | Probably Low   | Definitely Low |
| King 2022b<br>BRAVE-AA1 | Discontinuation due to Adverse Event | Definitely Low | Definitely Low | Definitely Low | Definitely Low | Probably Low | Probably Low | Probably Low | Low | Probably Low   | Definitely Low |

|                             |                                         |                   |                   |                   |                   |                 |                 |                 |              |                 |                   |
|-----------------------------|-----------------------------------------|-------------------|-------------------|-------------------|-------------------|-----------------|-----------------|-----------------|--------------|-----------------|-------------------|
| King 2022b<br>BRAVE-<br>AA1 | Change from baseline<br>of SALT score   | Definitely<br>Low | Definitely<br>Low | Definitely<br>Low | Definitely<br>Low | Probably<br>Low | Probably<br>Low | Probably<br>Low | Low          | Probably<br>Low | Definitely<br>Low |
| King 2022b<br>BRAVE-<br>AA2 | SALT 90                                 | Definitely<br>Low | Definitely<br>Low | Definitely<br>Low | Definitely<br>Low | Probably<br>Low | Probably<br>Low | Probably<br>Low | Probable Low | Probably<br>Low | Definitely<br>Low |
| King 2022b<br>BRAVE-<br>AA2 | SALT score $\leq 20$                    | Definitely<br>Low | Definitely<br>Low | Definitely<br>Low | Definitely<br>Low | Probably<br>Low | Probably<br>Low | Probably<br>Low | Probable Low | Probably<br>Low | Definitely<br>Low |
| King 2022b<br>BRAVE-<br>AA2 | SALT score $\leq 10$                    | Definitely<br>Low | Definitely<br>Low | Definitely<br>Low | Definitely<br>Low | Probably<br>Low | Probably<br>Low | Probably<br>Low | Probable Low | Probably<br>Low | Definitely<br>Low |
| King 2022b<br>BRAVE-<br>AA2 | Treatment-related<br>adverse event      | Definitely<br>Low | Definitely<br>Low | Definitely<br>Low | Definitely<br>Low | Probably<br>Low | Probably<br>Low | Probably<br>Low | Probable Low | Probably<br>Low | Definitely<br>Low |
| King 2022b<br>BRAVE-<br>AA2 | Severe adverse event                    | Definitely<br>Low | Definitely<br>Low | Definitely<br>Low | Definitely<br>Low | Probably<br>Low | Probably<br>Low | Probably<br>Low | Probable Low | Probably<br>Low | Definitely<br>Low |
| King 2022b<br>BRAVE-<br>AA2 | Discontinuation due<br>to Adverse Event | Definitely<br>Low | Definitely<br>Low | Definitely<br>Low | Definitely<br>Low | Probably<br>Low | Probably<br>Low | Probably<br>Low | Probable Low | Probably<br>Low | Definitely<br>Low |
| King 2022b<br>BRAVE-<br>AA2 | Change from baseline<br>of SALT score   | Definitely<br>Low | Definitely<br>Low | Definitely<br>Low | Definitely<br>Low | Probably<br>Low | Probably<br>Low | Probably<br>Low | Probable Low | Probably<br>Low | Definitely<br>Low |

## **eAppendix 2: Detail of Subgroup analysis**

### **Effects of JAK inhibitors**

#### ***Change from baseline of SALT scores***

Subgroup analysis by route of administration, the results showed that oral JAK inhibitors lowered more SALT scores from baseline compared to placebo (MD = - 36.80, 95%CI: -39.57 to -34.02, eFigure 1), and there was no different between external JAK inhibitors and placebo (MD = - 0.40, 95%CI: -11.30 to 10.50; eFigure 1). Applying ICEMAN criteria, we judged the credibility as moderate (eTable 3). Subgroup analysis by different drugs, the results showed that “ritilecitinib” (MD = - 31.10, 95%CI: -37.21 to -24.99; eFigure 2), “brepocitinib” (MD = - 49.20, 95%CI: -55.42 to -49.28; eFigure 2) and “baricitinib” (MD = - 36.28, 95%CI: -39.25 to -33.31; eFigure 2) lowered more SALT scores from baseline compared to placebo. There was no different between “delgocitinib” and placebo (MD= - 0.40, 95%CI: -11.30 to 10.50; eFigure 2). Applying ICEMAN criteria, we judged the credibility as low (eTable 3).

#### ***SALT 50***

Subgroup analysis by route of administration, the results showed that oral JAK inhibitors enabled more participants achieved a 50% improvement in SALT score from baseline compared to placebo (OR = 12.89, 95%CI: 5.86 to 28.35; eFigure 3), and no different between external JAK inhibitors and placebo (OR = 0.99, 95%CI: 0.33 to 2.95; eFigure 3). Applying ICEMAN criteria, we judged the credibility as moderate (eTable 3). Subgroup analysis by different drugs, the results showed that “ritilecitinib” (OR = 20.49, 95%CI: 3.66 to 114.85; eFigure 4), “brepocitinib” (OR = 32.32, 95%CI: 5.78 to 180.77;

eFigure 4) and “baricitinib” (OR = 10.60, 95%CI: 4.34 to 25.89; eFigure 4) enabled more participants achieved a 50% improvement in SALT score from baseline compared to placebo. It is no different between “ruxolitinib” (OR = 1.00, 95%CI: 0.28 to 3.57; eFigure 4) and placebo, and no different between “delgocitinib” (OR = 0.95, 95%CI: 0.11 to 8.21; eFigure 4) and placebo. Applying ICEMAN criteria, we judged the credibility as low (eTable 3).

### **SALT 90**

Subgroup analysis by route of administration, the results showed that oral JAK inhibitors enabled more participants achieved a 90% improvement in SALT score from baseline compared to placebo (OR = 9.56, 95%CI: 4.23 to 21.57; eFigure 5), and no different between external JAK inhibitors and placebo (OR = 5.27, 95%CI: 0.24 to 113.35; eFigure 5). Applying ICEMAN criteria, we judged the credibility as moderate (eTable 3). Subgroup analysis by different drugs, the results showed that “ritlecitinib” (OR = 32.53, 95%CI: 1.86 to 567.78; eFigure 6), “brepocitinib” (OR = 45.31, 95%CI: 2.62 to 784.28; eFigure 6) and “baricitinib” (OR = 8.16, 95%CI: 3.83 to 17.39; eFigure 6) enabled more participants achieved a 90% improvement in SALT score from baseline compared to placebo. It is no different between “ruxolitinib” (OR = 5.27, 95%CI: 0.24 to 113.35; eFigure 6) and placebo. Applying ICEMAN criteria, we judged the credibility as low (eTable 3).

### **SALT score $\leq$ 20**

Subgroup analysis by different drugs, the results showed that “CTP-543” (OR = 4.79, 95%CI: 1.49 to 15.42; eFigure 7) and “baricitinib” (OR = 7.90, 95%CI: 4.99 to 12.50;

eFigure 7) enables more percentage of patients to achieve SALT score  $\leq 20$  over treatment period compared to placebo. Applying ICEMAN criteria, we judged the credibility as low (eTable 3).

### **Adverse events of JAK inhibitors**

#### ***Treatment-related adverse event***

Subgroup analysis by route of administration, the results showed that oral JAK inhibitors (RR = 1.07, 95%CI: 0.51 to 2.26; eFigure 8) and external JAK inhibitors (RR = 1.10, 95%CI: 1.00 to 1.21; eFigure 8) all may not cause more treatment-related adverse events compared with placebo. Applying ICEMAN criteria, we judged the credibility as moderate (eTable 3). Subgroup analysis by different drugs, the results showed that “ruxolitinib” (OR = 1.00, 95%CI: 0.40 to 2.49; eFigure 9), “delgocitinib” (OR = 1.23, 95%CI: 0.33 to 4.57; eFigure 9), “CTP-543” (OR = 1.22, 95%CI: 0.82 to 1.81; eFigure 9) and “baricitinib” (OR = 1.09, 95%CI: 0.99 to 1.21; eFigure 9) all may not cause more treatment-related adverse events compared with placebo. Applying ICEMAN criteria, we judged the credibility as low (eTable 3).

#### ***Severe adverse event***

Subgroup analysis by route of administration, the results showed that oral JAK inhibitors (RR = 0.70, 95%CI: 0.32 to 1.53; eFigure 10) and external JAK inhibitors (RR = 3.00, 95%CI: 0.13 to 71.43; eFigure 10) all may not cause severe adverse events compared with placebo. Applying ICEMAN criteria, we judged the credibility as moderate (eTable 3). Subgroup analysis by different drugs, the results showed that “ritlecitinib” (OR = 0.20, 95%CI: 0.01 to 3.97; eFigure 11), “brepocitinib” (OR = 0.20,



95%CI: 0.01 to 4.06; eFigure 11), “ruxolitinib” (OR = 3.00, 95%CI: 0.13 to 71.43; eFigure 11), “CTP-543” (OR = 0.42, 95%CI: 0.08 to 2.35; eFigure 11) and “baricitinib” (OR = 0.92, 95%CI: 0.36 to 2.36; eFigure 11) all may not cause more treatment-related adverse events compared with placebo. Applying ICEMAN criteria, we judged the credibility as low (eTable 3).

### ***Discontinuation due to Adverse Event***

Subgroup analysis by route of administration, the results showed that oral JAK inhibitors (RR = 0.89, 95%CI: 0.44 to 1.78; eFigure 12) and external JAK inhibitors (RR = 0.33, 95%CI: 0.01 to 7.94; eFigure 12) all may not cause severe adverse events compared with placebo. Applying ICEMAN criteria, we judged the credibility as moderate (eTable 3). Subgroup analysis by different drugs, the results showed that “ritlecitinib” (OR = 1.63, 95%CI: 0.22 to 11.87; eFigure 13), “brepocitinib” (OR = 1.67, 95%CI: 0.23 to 12.12; eFigure 13), “ruxolitinib” (OR = 0.33, 95%CI: 0.01 to 7.94; eFigure 13), “CTP-543” (OR = 0.30, 95%CI: 0.06 to 1.47; eFigure 13) and “baricitinib” (OR = 1.08, 95%CI: 0.46 to 2.56; eFigure 13) all may not cause more treatment-related adverse events compared with placebo. Applying ICEMAN criteria, we judged the credibility as low (eTable 3).

**eTable 3. Credibility assessment of subgroup analysis**

**eTable 3.1 Credibility assessment of route of administration for Change from baseline of SALT scores**

**1: Is the analysis of effect modification based on comparison within rather than between trials?**

Completely between       Mostly between or unclear       Mostly within       Completely within

*Subgroup analysis or meta-regression Subgroup analysis or meta- Most trials providing within-trial All trials providing within-trial comparing overall effects of each regression with most information subgroup information; or individual subgroup information or individual individual trial. This is typical for coming from overall effects, but participant data analysis that participant data; and the analysis aggregate data meta-analysis. some trials providing within-trial combines within and between trial separates within from between trial subgroup information information information, e.g., meta-analysis of interactions*

Comment: Five trials provided within subgroups used for analysis.

**2: For within-trial comparisons, is the effect modification similar from trial to trial?**  Not applicable: no or one within-RCT comparison

Definitely not similar       Probably not similar or unclear       Mostly similar       Definitely similar

*Effect modification reported for two or Effect modification not reported for Effect modification reported for two Effect modification reported for two more trials and clearly different individual trials or too imprecise to or more trials, mostly similar in or more trials, similar in direction, directions tell direction, but considerable only some differences in magnitude differences in magnitude*

Comment: The MD (i.e., the within-trial measure of effect modification) is always in the same direction.

**3: For between-trial comparisons, is the number of trials large?**  Not applicable: no between RCT comparison

Very small       Rather small or unclear       Rather large       Large

*1 or 2 or in smallest subgroup; 5 or less 3-4 in smallest subgroup; 6-10 in 5-9 in smallest subgroup; 11 to 15 in 10 or more in smallest subgroup; in continuous meta-regression continuous meta-regression continuous meta-regression more than 15 in continuous meta-regression*

Comment: Two RTCs is a rather larger number and two RCTs is a rather small number.

**4: Was the direction of effect modification correctly hypothesised a priori?**

Definitely no       Probably no or unclear       Probably yes       Definitely yes

*Clearly post-hoc or results inconsistent Vague hypothesis or hypothesised No prior protocol available but Prior protocol available and includes with hypothesised direction or direction unclear unequivocal statement of a priori correct specification of direction of hypothesis with correct direction of effect modification, e.g., based on a effect modification biologic rationale*

Comment: No information.

**5: Does a test for interaction suggest that chance is an unlikely explanation of the apparent effect modification?** (consider irrespective of number of effect modifiers)

Chance a very likely explanation       Chance a likely explanation or unclear       Chance may not explain       Chance an unlikely explanation

*Interaction or meta-regression p-value Interaction or meta-regression p- Interaction or meta-regression p- Interaction or meta-regression p- >0.05 value ≤0.05 and >0.01, or no test of value ≤0.01 and >0.005 value ≤0.005 value ≤0.005*

---

interaction reported and not  
computable

Comment: The interaction P-value = 0.01.

**6: Did the authors test only a small number of effect modifiers or consider the number in their statistical analysis?**

Definitely no                       Probably no or unclear                       Probably yes                       Definitely yes

*Explicitly exploratory analysis or large No mention of number or 4-10 effect No protocol available but Protocol available and 3 or fewer  
number of effect modifiers tested modifiers tested and number not unequivocal statement of 3 or fewer effect modifiers tested or number  
(e.g., greater than 10) and multiplicity considered in analysis effect modifiers tested considered in analysis  
not considered in analysis*

Comment: Two effect modifiers were tested in this review.

**7: Did the authors use a random effects model?**  Not applicable

Definitely no                       Probably no or unclear                       Probably yes                       Definitely yes

*Fixed (or common) effect or fixed Probably fixed effect(s) model Probably random (or mixed) effects Random (or mixed) effects explicitly  
effects model explicitly stated stated*

Comment: Yes, random effects model for combining the interaction estimates.

**8: If the effect modifier is a continuous variable, were arbitrary cut points avoided?**  not applicable: not continuous

Definitely no                       Probably no or unclear                       Probably yes                       Definitely yes

*Analysis based on exploratory cut Analysis based on cut point(s) of Analysis based on pre-specified cut Analysis based on the full  
point(s), e.g., picking cut point unclear origin point(s), e.g., suggested by prior RCT continuum, e.g., assuming a linear  
associated with highest interaction p- or logarithmic relationship  
value*

Comment: We analysis this outcome as continuous variable.

**9 Optional: Are there any additional considerations that may increase or decrease credibility?** (manual section 3.9)  not applicable

Yes, probably decrease                       Yes, probably increase  
Biologically implausible  
Expect similar severe critical  
Opposite effects unlikely

Comment:

---

**10: How would you rate the overall credibility of the proposed effect modification?**

The overall rating should be driven by the items that decrease credibility. The following provides a sensible strategy:

- All responses definitely or probably decrease credibility or unclear → very low
- Two or more responses definitely decrease credibility → maximum usually low even if all other responses satisfy credibility criteria
- One response definitely decreases credibility → maximum usually moderate even if all other responses satisfy credibility criteria
- Two responses probably decrease credibility → maximum usually moderate even if all other responses satisfy credibility criteria
- No response options definitely or probably decrease credibility → high very likely

Place a mark on the continuous line (or type "x" in editable version)

---

X

|  |  |  |  |
|--|--|--|--|
|  |  |  |  |
|--|--|--|--|

| Very low credibility                                                       | Low credibility                                                                                      | Moderate credibility                                                                                | High credibility                                                          |
|----------------------------------------------------------------------------|------------------------------------------------------------------------------------------------------|-----------------------------------------------------------------------------------------------------|---------------------------------------------------------------------------|
| Very likely no effect modification<br>Use overall effect for each subgroup | Likely no effect modification<br>Use overall effect for each subgroup but note remaining uncertainty | Likely effect modification<br>Use separate effects for each subgroup but note remaining uncertainty | Very likely effect modification<br>Use separate effects for each subgroup |

Comment:

**eTable 3.2 Credibility assessment of different drugs for Change from baseline of SALT scores**

**1: Is the analysis of effect modification based on comparison within rather than between trials?**

Completely between       Mostly between or unclear       Mostly within       Completely within  
*Subgroup analysis or meta-regression comparing overall effects of each regression with most individual trial. This is typical for coming from overall effects, but participant data aggregate data meta-analysis.*      *Subgroup analysis or meta- Most trials providing within-trial information subgroup information; or individual subgroup information or individual trial. This is typical for coming from overall effects, but participant data analysis that participant data; and the analysis some trials providing within-trial combines within and between trial separates within from between trial subgroup information*      *information*      *All trials providing within-trial information, e.g., meta-analysis of interactions*

Comment: Five trials provided within subgroups used for analysis.

**2: For within-trial comparisons, is the effect modification similar from trial to trial?**  Not applicable: no or one within-RCT comparison

Definitely not similar       Probably not similar or unclear       Mostly similar       Definitely similar  
*Effect modification reported for two or more trials and clearly different individual trials or too imprecise to tell directions*      *Effect modification not reported for more trials, mostly similar in direction, but considerable differences in magnitude*      *Effect modification reported for two or more trials, similar in direction, but considerable only some differences in magnitude*      *Effect modification reported for two or more trials, similar in direction, but considerable only some differences in magnitude*

Comment: The ratio of OR (i.e., the within-trial measure of effect modification) is always in the same direction.

**3: For between-trial comparisons, is the number of trials large?**  Not applicable: no between RCT comparison

Very small       Rather small or unclear       Rather large       Large  
*1 or 2 or in smallest subgroup; 5 or less in continuous meta-regression*      *3-4 in smallest subgroup; 6-10 in continuous meta-regression*      *5-9 in smallest subgroup; 11 to 15 in continuous meta-regression*      *10 or more in smallest subgroup; more than 15 in continuous meta-regression*

Comment: Three RTCs is a rather larger number and two RCTs is a rather small number.

**4: Was the direction of effect modification correctly hypothesised a priori?**

Definitely no       Probably no or unclear       Probably yes       Definitely yes  
*Clearly post-hoc or results inconsistent with hypothesised direction or direction unclear biologically very implausible*      *Vague hypothesis or hypothesised No prior protocol available but unequivocal statement of a priori correct specification of direction of hypothesis with correct direction of effect modification, e.g., based on a effect modification*      *Prior protocol available and includes hypothesis with correct direction of effect modification, e.g., based on a biologic rationale*

Comment: No information.

**5: Does a test for interaction suggest that chance is an unlikely explanation of the apparent effect modification?** (consider irrespective of number of effect modifiers)

Chance a very likely explanation       Chance a likely explanation or unclear       Chance may not explain       Chance an unlikely explanation

---

Interaction or meta-regression p-value >0.05      Interaction or meta-regression p-value ≤0.05 and >0.01, or no test of interaction reported and not computable      Interaction or meta-regression p-value ≤0.01 and >0.005      Interaction or meta-regression p-value ≤0.005

Comment: The interaction P-value < 0.01.

**6: Did the authors test only a small number of effect modifiers or consider the number in their statistical analysis?**

Definitely no       Probably no or unclear       Probably yes       Definitely yes

Explicitly exploratory analysis or large number of effect modifiers tested (e.g., greater than 10) and multiplicity not considered in analysis      No mention of number of effect modifiers tested and number not unequivocal statement of 3 or fewer effect modifiers tested      No protocol available but Protocol available and 3 or fewer effect modifiers tested      Protocol available and 3 or fewer effect modifiers tested or number considered in analysis

Comment: Two effect modifiers were tested in this review.

**7: Did the authors use a random effects model?**  Not applicable

Definitely no       Probably no or unclear       Probably yes       Definitely yes

Fixed (or common) effect or fixed effects model explicitly stated      Probably fixed effect(s) model      Probably random (or mixed) effects      Random (or mixed) effects explicitly stated

Comment: Yes, random effects model for combining the interaction estimates.

**8: If the effect modifier is a continuous variable, were arbitrary cut points avoided?**  not applicable: not continuous

Definitely no       Probably no or unclear       Probably yes       Definitely yes

Analysis based on exploratory cut point(s), e.g., picking cut point associated with highest interaction p-value      Analysis based on cut point(s) of unclear origin      Analysis based on pre-specified cut point(s), e.g., suggested by prior RCT continuum, e.g., assuming a linear or logarithmic relationship

Comment: We analysis this outcome as continuous variable.

**9 Optional: Are there any additional considerations that may increase or decrease credibility?** (manual section 3.9)  not applicable

Yes, probably decrease       Yes, probably increase  
Biologically implausible  
Expect similar severe critical  
Opposite effects unlikely

Comment:

---

**10: How would you rate the overall credibility of the proposed effect modification?**

The overall rating should be driven by the items that decrease credibility. The following provides a sensible strategy:

- All responses definitely or probably decrease credibility or unclear → very low
- Two or more responses definitely decrease credibility → maximum usually low even if all other responses satisfy credibility criteria
- One response definitely decreases credibility → maximum usually moderate even if all other responses satisfy credibility criteria
- Two responses probably decrease credibility → maximum usually moderate even if all other responses satisfy credibility criteria
- No response options definitely or probably decrease credibility → high very likely

Place a mark on the continuous line (or type "x" in editable version)

---

X

**Very low credibility**

**Low credibility**

**Moderate credibility**

**High credibility**

Very likely no effect modification

Likely no effect modification

Likely effect modification

Very likely effect modification

Use overall effect for each  
subgroup

Use overall effect for each  
subgroup but note remaining  
uncertainty

Use separate effects for each  
subgroup but note remaining  
uncertainty

Use separate effects for each  
subgroup

Comment:

---

**eTable 3.3 Credibility assessment of route of administration for SALT 50**

**1: Is the analysis of effect modification based on comparison within rather than between trials?**

Completely between       Mostly between or unclear       Mostly within       Completely within

*Subgroup analysis or meta-regression comparing overall effects of each regression with most aggregate data meta-analysis. Subgroup analysis or meta-regression with most information subgroup information; or individual subgroup information or individual trial. This is typical for coming from overall effects, but participant data analysis that participant data; and the analysis combines within and between trial separates within from between trial subgroup information information information, e.g., meta-analysis of interactions*

Comment: Five trials provided within subgroups used for analysis.

**2: For within-trial comparisons, is the effect modification similar from trial to trial?**  Not applicable: no or one within-RCT comparison

Definitely not similar       Probably not similar or unclear       Mostly similar       Definitely similar

*Effect modification reported for two or more trials and clearly different directions Effect modification not reported for two or more trials, mostly similar in directions Effect modification reported for two or more trials, similar in direction, but considerable only some differences in magnitude Effect modification reported for two or more trials, similar in direction, differences in magnitude*

Comment: The OR (i.e., the within-trial measure of effect modification) is always in the same direction.

**3: For between-trial comparisons, is the number of trials large?**  Not applicable: no between RCT comparison

Very small       Rather small or unclear       Rather large       Large

*1 or 2 or in smallest subgroup; 5 or less in continuous meta-regression 3-4 in smallest subgroup; 6-10 in continuous meta-regression 5-9 in smallest subgroup; 11 to 15 in continuous meta-regression 10 or more in smallest subgroup; more than 15 in continuous meta-regression*

Comment: Two RTCs is a rather larger number and two RCTs is a rather small number.

**4: Was the direction of effect modification correctly hypothesised a priori?**

Definitely no       Probably no or unclear       Probably yes       Definitely yes

*Clearly post-hoc or results inconsistent with hypothesised direction or direction unclear biologically very implausible Vague hypothesis or hypothesised No prior protocol available but unequivocal statement of a priori correct specification of direction of hypothesis with correct direction of effect modification, e.g., based on a effect modification biologic rationale*

Comment: No information.

**5: Does a test for interaction suggest that chance is an unlikely explanation of the apparent effect modification?** (consider irrespective of number of effect modifiers)

Chance a very likely explanation       Chance a likely explanation or       Chance may not explain       Chance an unlikely explanation



---

unclear

Interaction or meta-regression p-value >0.05      Interaction or meta-regression p-value ≤0.05 and >0.01, or no test of interaction reported and not computable      Interaction or meta-regression p-value ≤0.01 and >0.005      Interaction or meta-regression p-value ≤0.005

Comment: The interaction P-value < 0.01.

**6: Did the authors test only a small number of effect modifiers or consider the number in their statistical analysis?**

Definitely no       Probably no or unclear       Probably yes       Definitely yes

Explicitly exploratory analysis or large number of effect modifiers tested (e.g., greater than 10) and multiplicity not considered in analysis      No mention of number of effect modifiers tested and number not unequivocal statement of 3 or fewer effect modifiers tested      No protocol available but Protocol available and 3 or fewer effect modifiers tested      Protocol available and 3 or fewer effect modifiers tested and number considered in analysis

Comment: Two effect modifiers were tested in this review.

**7: Did the authors use a random effects model?**  Not applicable

Definitely no       Probably no or unclear       Probably yes       Definitely yes

Fixed (or common) effect or fixed effects model explicitly stated      Probably fixed effect(s) model      Probably random (or mixed) effects      Random (or mixed) effects explicitly stated

Comment: Yes, random effects model for combining the interaction estimates.

**8: If the effect modifier is a continuous variable, were arbitrary cut points avoided?**  not applicable: not continuous

Definitely no       Probably no or unclear       Probably yes       Definitely yes

Analysis based on exploratory cut point(s), e.g., picking cut point associated with highest interaction p-value      Analysis based on cut point(s) of unclear origin      Analysis based on pre-specified cut point(s), e.g., suggested by prior RCT continuum, e.g., assuming a linear or logarithmic relationship      Analysis based on the full continuum, e.g., assuming a linear or logarithmic relationship

Comment:

**9 Optional: Are there any additional considerations that may increase or decrease credibility?** (manual section 3.9)  not applicable

Yes, probably decrease       Yes, probably increase  
Biologically implausible  
Expect similar severe critical  
Opposite effects unlikely

Comment:

---

---

---

**10: How would you rate the overall credibility of the proposed effect modification?**

The overall rating should be driven by the items that decrease credibility. The following provides a sensible strategy:

- All responses definitely or probably decrease credibility or unclear → very low
- Two or more responses definitely decrease credibility → maximum usually low even if all other responses satisfy credibility criteria
- One response definitely decreases credibility → maximum usually moderate even if all other responses satisfy credibility criteria
- Two responses probably decrease credibility → maximum usually moderate even if all other responses satisfy credibility criteria
- No response options definitely or probably decrease credibility → high very likely

Place a mark on the continuous line (or type “x” in editable version)

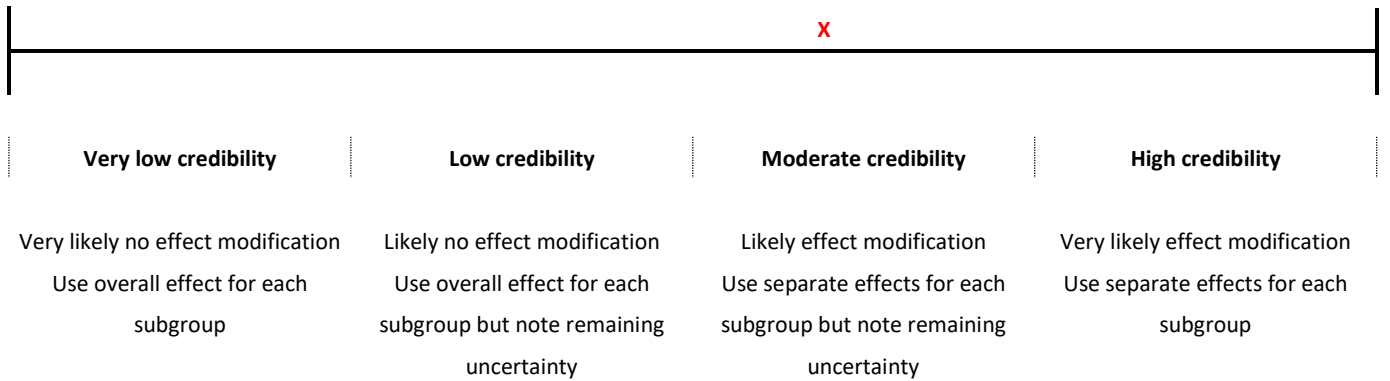

Comment:

---

**eTable 3.4 Credibility assessment of different drugs for SALT 50**

**1: Is the analysis of effect modification based on comparison within rather than between trials?**

Completely between       Mostly between or unclear       Mostly within       Completely within  
*Subgroup analysis or meta-regression comparing overall effects of each regression with most information from individual trial. This is typical for aggregate data meta-analysis.*      *Subgroup analysis or meta-regression combining some trials providing within-trial information.*      *Most trials providing within-trial information.*      *All trials providing within-trial information, e.g., meta-analysis of interactions.*

Comment: Five trials provided within subgroups used for analysis.

**2: For within-trial comparisons, is the effect modification similar from trial to trial?**  Not applicable: no or one within-RCT comparison

Definitely not similar       Probably not similar or unclear       Mostly similar       Definitely similar  
*Effect modification reported for two or more trials and clearly different directions.*      *Effect modification not reported for two or more trials, mostly similar in direction, but considerable differences in magnitude.*      *Effect modification reported for two or more trials, similar in direction, but considerable differences in magnitude.*      *Effect modification reported for two or more trials, similar in direction, but considerable differences in magnitude.*

Comment: The ratio of OR (i.e., the within-trial measure of effect modification) is always in the same direction.

**3: For between-trial comparisons, is the number of trials large?**  Not applicable: no between RCT comparison

Very small       Rather small or unclear       Rather large       Large  
*1 or 2 or in smallest subgroup; 5 or less in continuous meta-regression.*      *3-4 in smallest subgroup; 6-10 in continuous meta-regression.*      *5-9 in smallest subgroup; 11 to 15 in continuous meta-regression.*      *10 or more in smallest subgroup; more than 15 in continuous meta-regression.*

Comment: Three RCTs is a rather larger number and two RCTs is a rather small number.

---

**4: Was the direction of effect modification correctly hypothesised a priori?**

Definitely no                       Probably no or unclear                       Probably yes                       Definitely yes

*Clearly post-hoc or results inconsistent with hypothesised direction or direction unclear biologically very implausible*                      *Vague hypothesis or hypothesised No prior protocol available but unequivocal statement of a priori correct specification of direction of hypothesis with correct direction of effect modification, e.g., based on a effect modification*                      *Prior protocol available and includes biologic rationale*

Comment: No information.

**5: Does a test for interaction suggest that chance is an unlikely explanation of the apparent effect modification?** (consider irrespective of number of effect modifiers)

Chance a very likely explanation                       Chance a likely explanation or unclear                       Chance may not explain                       Chance an unlikely explanation

*Interaction or meta-regression p-value >0.05*                      *Interaction or meta-regression p-value ≤0.05 and >0.01, or no test of interaction reported and not computable*                      *Interaction or meta-regression p-value ≤0.01 and >0.005*                      *Interaction or meta-regression p-value ≤0.005*

Comment: The interaction P-value < 0.01.

**6: Did the authors test only a small number of effect modifiers or consider the number in their statistical analysis?**

Definitely no                       Probably no or unclear                       Probably yes                       Definitely yes

*Explicitly exploratory analysis or large number of effect modifiers tested (e.g., greater than 10) and multiplicity not considered in analysis*                      *No mention of number or 4-10 effect modifiers tested and number not unequivocal statement of 3 or fewer effect modifiers tested or number effect modifiers tested*                      *Protocol available but Protocol available and 3 or fewer effect modifiers tested or number considered in analysis*

Comment: Two effect modifiers were tested in this review.

**7: Did the authors use a random effects model?**  Not applicable

Definitely no                       Probably no or unclear                       Probably yes                       Definitely yes

*Fixed (or common) effect or fixed effects model explicitly stated*                      *Probably fixed effect(s) model*                      *Probably random (or mixed) effects*                      *Random (or mixed) effects explicitly stated*

Comment: Yes, random effects model for combining the interaction estimates.

**8: If the effect modifier is a continuous variable, were arbitrary cut points avoided?**  not applicable: not continuous

Definitely no                       Probably no or unclear                       Probably yes                       Definitely yes

*Analysis based on exploratory cut point(s), e.g., picking cut point associated with highest interaction p-value*                      *Analysis based on cut point(s) of unclear origin*                      *Analysis based on pre-specified cut point(s), e.g., suggested by prior RCT continuum, e.g., assuming a linear or logarithmic relationship*                      *Analysis based on the full*

Comment:

**9 Optional: Are there any additional considerations that may increase or decrease credibility?** (manual section 3.9)  not applicable

Yes, probably decrease                       Yes, probably increase  
Biologically implausible  
Expect similar severe critical

---

Opposite effects unlikely

Comment:

---

**10: How would you rate the overall credibility of the proposed effect modification?**

The overall rating should be driven by the items that decrease credibility. The following provides a sensible strategy:

- All responses definitely or probably decrease credibility or unclear → very low
- Two or more responses definitely decrease credibility → maximum usually low even if all other responses satisfy credibility criteria
- One response definitely decreases credibility → maximum usually moderate even if all other responses satisfy credibility criteria
- Two responses probably decrease credibility → maximum usually moderate even if all other responses satisfy credibility criteria
- No response options definitely or probably decrease credibility → high very likely

Place a mark on the continuous line (or type "x" in editable version)

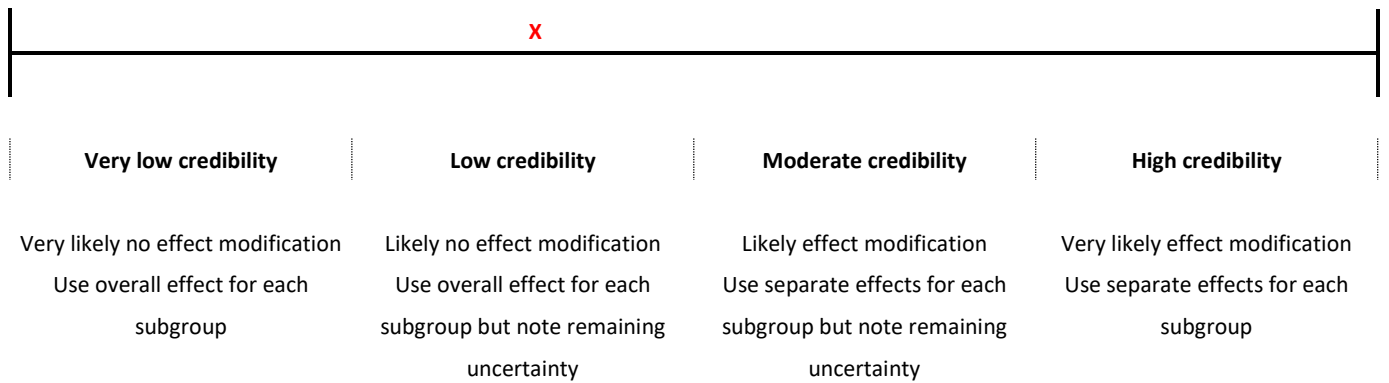

Comment:

---

**eTable 3.5 Credibility assessment of route of administration for SALT 90**

**1: Is the analysis of effect modification based on comparison within rather than between trials?**

Completely between       Mostly between or unclear       Mostly within       Completely within

*Subgroup analysis or meta-regression comparing overall effects of each regression with most individual trial. This is typical for coming from overall effects, but aggregate data meta-analysis.*      *Subgroup analysis or meta-regression with most information subgroup information; or individual subgroup information or individual trial. This is typical for coming from overall effects, but participant data analysis that participant data; and the analysis some trials providing within-trial combines within and between trial separates within from between trial subgroup information*      *Most trials providing within-trial information*      *All trials providing within-trial information, e.g., meta-analysis of interactions*

Comment: Five trials provided within subgroups used for analysis.

**2: For within-trial comparisons, is the effect modification similar from trial to trial?**  Not applicable: no or one within-RCT comparison

Definitely not similar       Probably not similar or unclear       Mostly similar       Definitely similar

*Effect modification reported for two or more trials and clearly different individual trials or too imprecise to tell*      *Effect modification not reported for two or more trials, mostly similar in direction, but considerable only some differences in magnitude*      *Effect modification reported for two or more trials, similar in direction, differences in magnitude*

Comment: The OR (i.e., the within-trial measure of effect modification) is always in the same direction.

**3: For between-trial comparisons, is the number of trials large?**  Not applicable: no between RCT comparison

Very small       Rather small or unclear       Rather large       Large

*1 or 2 or in smallest subgroup; 5 or less in continuous meta-regression*      *3-4 in smallest subgroup; 6-10 in continuous meta-regression*      *5-9 in smallest subgroup; 11 to 15 in continuous meta-regression*      *10 or more in smallest subgroup; more than 15 in continuous meta-*

Comment: Two RTCs is a rather larger number and two RCTs is a rather small number.

**4: Was the direction of effect modification correctly hypothesised a priori?**

Definitely no                       Probably no or unclear                       Probably yes                       Definitely yes

*Clearly post-hoc or results inconsistent with hypothesised direction or direction unclear biologically very implausible*                      *Vague hypothesis or hypothesised No prior protocol available but unequivocal statement of a priori correct specification of direction of hypothesis with correct direction of effect modification, e.g., based on a effect modification*                      *Prior protocol available and includes biologic rationale*

Comment: No information.

**5: Does a test for interaction suggest that chance is an unlikely explanation of the apparent effect modification?** (consider irrespective of number of effect modifiers)

Chance a very likely explanation                       Chance a likely explanation or unclear                       Chance may not explain                       Chance an unlikely explanation

*Interaction or meta-regression p-value >0.05*                      *Interaction or meta-regression p-value ≤0.05 and >0.01, or no test of interaction reported and not computable*                      *Interaction or meta-regression p-value ≤0.01 and >0.005*                      *Interaction or meta-regression p-value ≤0.005*

Comment: The interaction P-value < 0.01.

**6: Did the authors test only a small number of effect modifiers or consider the number in their statistical analysis?**

Definitely no                       Probably no or unclear                       Probably yes                       Definitely yes

*Explicitly exploratory analysis or large number of effect modifiers tested (e.g., greater than 10) and multiplicity not considered in analysis*                      *No mention of number of effect modifiers tested and number not unequivocal statement of 3 or fewer effect modifiers tested or number considered in analysis*                      *No protocol available but effect modifiers tested*                      *Protocol available and 3 or fewer effect modifiers tested or number considered in analysis*

Comment: Two effect modifiers were tested in this review.

**7: Did the authors use a random effects model?**  Not applicable

Definitely no                       Probably no or unclear                       Probably yes                       Definitely yes

*Fixed (or common) effect effects model explicitly stated*                      *Probably fixed effect(s) model*                      *Probably random (or mixed) effects*                      *Random (or mixed) effects explicitly stated*

Comment: Yes, random effects model for combining the interaction estimates.

**8: If the effect modifier is a continuous variable, were arbitrary cut points avoided?**  not applicable: not continuous

Definitely no                       Probably no or unclear                       Probably yes                       Definitely yes

*Analysis based on exploratory cut point(s), e.g., picking cut point associated with highest interaction p-value*                      *Analysis based on cut point(s) of unclear origin*                      *Analysis based on pre-specified cut point(s), e.g., suggested by prior RCT continuum, e.g., assuming a linear or logarithmic relationship*                      *Analysis based on the full*

Comment:

**9 Optional: Are there any additional considerations that may increase or decrease credibility?** (manual section 3.9)  not applicable

Yes, probably decrease                       Yes, probably increase

---

Biologically implausible  
Expect similar severe critical  
Opposite effects unlikely

Comment:

---

**10: How would you rate the overall credibility of the proposed effect modification?**

The overall rating should be driven by the items that decrease credibility. The following provides a sensible strategy:

- All responses definitely or probably decrease credibility or unclear → very low
- Two or more responses definitely decrease credibility → maximum usually low even if all other responses satisfy credibility criteria
- One response definitely decreases credibility → maximum usually moderate even if all other responses satisfy credibility criteria
- Two responses probably decrease credibility → maximum usually moderate even if all other responses satisfy credibility criteria
- No response options definitely or probably decrease credibility → high very likely

Place a mark on the continuous line (or type "x" in editable version)

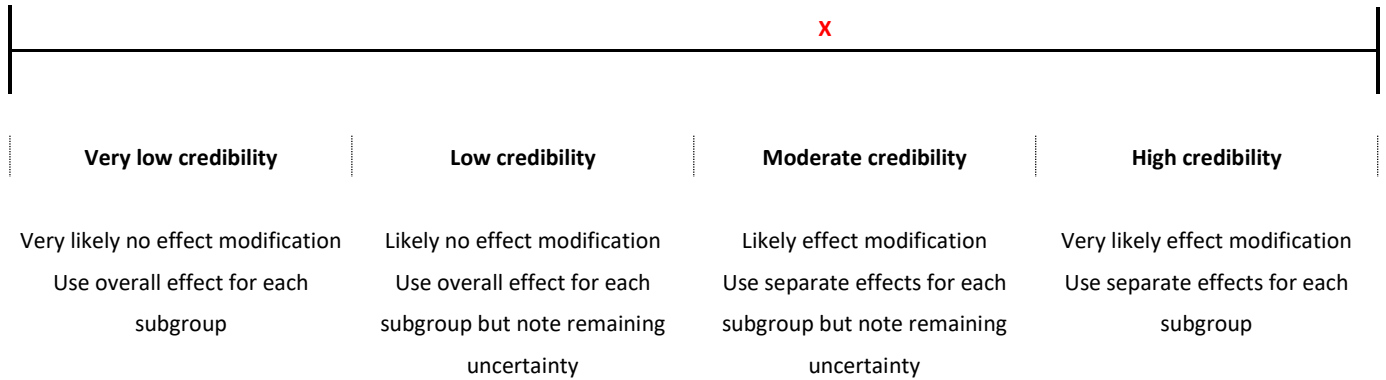

Comment:

---



**eTable 3.6 Credibility assessment of different drugs for SALT 90**

**1: Is the analysis of effect modification based on comparison within rather than between trials?**

Completely between       Mostly between or unclear       Mostly within       Completely within

*Subgroup analysis or meta-regression Subgroup analysis or meta- Most trials providing within-trial All trials providing within-trial comparing overall effects of each regression with most information subgroup information; or individual subgroup information or individual individual trial. This is typical for coming from overall effects, but participant data analysis that participant data; and the analysis aggregate data meta-analysis. some trials providing within-trial combines within and between trial separates within from between trial subgroup information information information, e.g., meta-analysis of interactions*

Comment: Five trials provided within subgroups used for analysis.

**2: For within-trial comparisons, is the effect modification similar from trial to trial?**  Not applicable: no or one within-RCT comparison

Definitely not similar       Probably not similar or unclear       Mostly similar       Definitely similar

*Effect modification reported for two or Effect modification not reported for Effect modification reported for two Effect modification reported for two more trials and clearly different individual trials or too imprecise to or more trials, mostly similar in or more trials, similar in direction, directions tell direction, but considerable only some differences in magnitude differences in magnitude*

Comment: The ratio of OR (i.e., the within-trial measure of effect modification) is always in the same direction.

**3: For between-trial comparisons, is the number of trials large?**  Not applicable: no between RCT comparison

Very small       Rather small or unclear       Rather large       Large

*1 or 2 or in smallest subgroup; 5 or less 3-4 in smallest subgroup; 6-10 in 5-9 in smallest subgroup; 11 to 15 in 10 or more in smallest subgroup; in continuous meta-regression continuous meta-regression continuous meta-regression more than 15 in continuous meta-regression*

Comment: Three RTCs is a rather larger number and two RCTs is a rather small number.

**4: Was the direction of effect modification correctly hypothesised a priori?**

Definitely no       Probably no or unclear       Probably yes       Definitely yes

*Clearly post-hoc or results inconsistent Vague hypothesis or hypothesised No prior protocol available but Prior protocol available and includes with hypothesised direction or direction unclear unequivocal statement of a priori correct specification of direction of hypothesis with correct direction of effect modification, e.g., based on a biologically very implausible effect modification biologic rationale*

Comment: No information.

**5: Does a test for interaction suggest that chance is an unlikely explanation of the apparent effect modification?** (consider irrespective of number of effect modifiers)

Chance a very likely explanation       Chance a likely explanation or unclear       Chance may not explain       Chance an unlikely explanation

*Interaction or meta-regression p-value Interaction or meta-regression p- Interaction or meta-regression p- Interaction or meta-regression p- >0.05 value ≤0.05 and >0.01, or no test of value ≤0.01 and >0.005 value ≤0.005 value ≤0.005 interaction reported and not*

---

computable

Comment: The interaction P-value < 0.01.

**6: Did the authors test only a small number of effect modifiers or consider the number in their statistical analysis?**

Definitely no                       Probably no or unclear                       Probably yes                       Definitely yes

*Explicitly exploratory analysis or large No mention of number or 4-10 effect No protocol available but Protocol available and 3 or fewer number of effect modifiers tested modifiers tested and number not unequivocal statement of 3 or fewer effect modifiers tested or number (e.g., greater than 10) and multiplicity considered in analysis effect modifiers tested considered in analysis not considered in analysis*

Comment: Two effect modifiers were tested in this review.

**7: Did the authors use a random effects model?**  Not applicable

Definitely no                       Probably no or unclear                       Probably yes                       Definitely yes

*Fixed (or common) effect or fixed Probably fixed effect(s) model Probably random (or mixed) effects Random (or mixed) effects explicitly effects model explicitly stated stated*

Comment: Yes, random effects model for combining the interaction estimates.

**8: If the effect modifier is a continuous variable, were arbitrary cut points avoided?**  not applicable: not continuous

Definitely no                       Probably no or unclear                       Probably yes                       Definitely yes

*Analysis based on exploratory cut Analysis based on cut point(s) of Analysis based on pre-specified cut Analysis based on the full point(s), e.g., picking cut point unclear origin point(s), e.g., suggested by prior RCT continuum, e.g., assuming a linear associated with highest interaction p- value or logarithmic relationship*

Comment:

**9 Optional: Are there any additional considerations that may increase or decrease credibility?** (manual section 3.9)  not applicable

Yes, probably decrease                       Yes, probably increase  
Biologically implausible  
Expect similar severe critical  
Opposite effects unlikely

Comment:

---

**10: How would you rate the overall credibility of the proposed effect modification?**

The overall rating should be driven by the items that decrease credibility. The following provides a sensible strategy:

- All responses definitely or probably decrease credibility or unclear → very low
- Two or more responses definitely decrease credibility → maximum usually low even if all other responses satisfy credibility criteria
- One response definitely decreases credibility → maximum usually moderate even if all other responses satisfy credibility criteria
- Two responses probably decrease credibility → maximum usually moderate even if all other responses satisfy credibility criteria
- No response options definitely or probably decrease credibility → high very likely

Place a mark on the continuous line (or type “x” in editable version)

---

X

---

**Very low credibility****Low credibility****Moderate credibility****High credibility**

Very likely no effect modification

Likely no effect modification

Likely effect modification

Very likely effect modification

Use overall effect for each  
subgroupUse overall effect for each  
subgroup but note remaining  
uncertaintyUse separate effects for each  
subgroup but note remaining  
uncertaintyUse separate effects for each  
subgroupComment:

---

**eTable 3.7 Credibility assessment of different drugs for SALT score ≤ 20**

**1: Is the analysis of effect modification based on comparison within rather than between trials?**

Completely between       Mostly between or unclear       Mostly within       Completely within

*Subgroup analysis or meta-regression Subgroup analysis or meta- Most trials providing within-trial All trials providing within-trial comparing overall effects of each regression with most information subgroup information; or individual subgroup information or individual individual trial. This is typical for coming from overall effects, but participant data analysis that participant data; and the analysis aggregate data meta-analysis. some trials providing within-trial combines within and between trial separates within from between trial subgroup information information information, e.g., meta-analysis of interactions*

Comment: Five trials provided within subgroups used for analysis.

**2: For within-trial comparisons, is the effect modification similar from trial to trial?**  Not applicable: no or one within-RCT comparison

Definitely not similar       Probably not similar or unclear       Mostly similar       Definitely similar

*Effect modification reported for two or Effect modification not reported for Effect modification reported for two Effect modification reported for two more trials and clearly different individual trials or too imprecise to or more trials, mostly similar in or more trials, similar in direction, directions tell direction, but considerable only some differences in magnitude differences in magnitude*

Comment: The ratio of OR (i.e., the within-trial measure of effect modification) is always in the same direction.

**3: For between-trial comparisons, is the number of trials large?**  Not applicable: no between RCT comparison

Very small       Rather small or unclear       Rather large       Large

*1 or 2 or in smallest subgroup; 5 or less 3-4 in smallest subgroup; 6-10 in 5-9 in smallest subgroup; 11 to 15 in 10 or more in smallest subgroup; in continuous meta-regression continuous meta-regression continuous meta-regression more than 15 in continuous meta-regression*

Comment: Three RTCs is a rather larger number and two RCTs is a rather small number.

**4: Was the direction of effect modification correctly hypothesised a priori?**

Definitely no       Probably no or unclear       Probably yes       Definitely yes

*Clearly post-hoc or results inconsistent Vague hypothesis or hypothesised No prior protocol available but Prior protocol available and includes with hypothesised direction or direction unclear unequivocal statement of a priori correct specification of direction of hypothesis with correct direction of effect modification, e.g., based on a biologically very implausible effect modification biologic rationale*

Comment: No information.

**5: Does a test for interaction suggest that chance is an unlikely explanation of the apparent effect modification?** (consider irrespective of number of effect modifiers)

Chance a very likely explanation       Chance a likely explanation or unclear       Chance may not explain       Chance an unlikely explanation

*Interaction or meta-regression p-value Interaction or meta-regression p- Interaction or meta-regression p- Interaction or meta-regression p- >0.05 value ≤0.05 and >0.01, or no test of value ≤0.01 and >0.005 value ≤0.005 value ≤0.005 interaction reported and not*

---

computable

Comment: The interaction P-value < 0.01.

**6: Did the authors test only a small number of effect modifiers or consider the number in their statistical analysis?**

Definitely no                       Probably no or unclear                       Probably yes                       Definitely yes

*Explicitly exploratory analysis or large number of effect modifiers tested (e.g., greater than 10) and multiplicity not considered in analysis*      *No mention of number or 4-10 effect modifiers tested and number not unequivocal statement of 3 or fewer effect modifiers tested*      *No protocol available but Protocol available and 3 or fewer effect modifiers tested and number not unequivocal statement of 3 or fewer effect modifiers tested or number considered in analysis*

Comment: Two effect modifiers were tested in this review.

**7: Did the authors use a random effects model?**  Not applicable

Definitely no                       Probably no or unclear                       Probably yes                       Definitely yes

*Fixed (or common) effect or fixed effects model explicitly stated*      *Probably fixed effect(s) model*      *Probably random (or mixed) effects*      *Random (or mixed) effects explicitly stated*

Comment: Yes, random effects model for combining the interaction estimates.

**8: If the effect modifier is a continuous variable, were arbitrary cut points avoided?**  not applicable: not continuous

Definitely no                       Probably no or unclear                       Probably yes                       Definitely yes

*Analysis based on exploratory cut point(s), e.g., picking cut point associated with highest interaction p-value*      *Analysis based on cut point(s) of unclear origin*      *Analysis based on pre-specified cut point(s), e.g., suggested by prior RCT continuum, e.g., assuming a linear or logarithmic relationship*

Comment:

**9 Optional: Are there any additional considerations that may increase or decrease credibility?** (manual section 3.9)  not applicable

Yes, probably decrease                       Yes, probably increase  
Biologically implausible  
Expect similar severe critical  
Opposite effects unlikely

Comment:

---

**10: How would you rate the overall credibility of the proposed effect modification?**

The overall rating should be driven by the items that decrease credibility. The following provides a sensible strategy:

- All responses definitely or probably decrease credibility or unclear → very low
- Two or more responses definitely decrease credibility → maximum usually low even if all other responses satisfy credibility criteria
- One response definitely decreases credibility → maximum usually moderate even if all other responses satisfy credibility criteria
- Two responses probably decrease credibility → maximum usually moderate even if all other responses satisfy credibility criteria
- No response options definitely or probably decrease credibility → high very likely

Place a mark on the continuous line (or type "x" in editable version)

X

---

**Very low credibility****Low credibility****Moderate credibility****High credibility**

Very likely no effect modification

Likely no effect modification

Likely effect modification

Very likely effect modification

Use overall effect for each  
subgroupUse overall effect for each  
subgroup but note remaining  
uncertaintyUse separate effects for each  
subgroup but note remaining  
uncertaintyUse separate effects for each  
subgroupComment:

---

**eTable 3.8 Credibility assessment of route of administration for Treatment-related adverse event**

**1: Is the analysis of effect modification based on comparison within rather than between trials?**

Completely between       Mostly between or unclear       Mostly within       Completely within

*Subgroup analysis or meta-regression Subgroup analysis or meta- Most trials providing within-trial All trials providing within-trial comparing overall effects of each regression with most information subgroup information; or individual subgroup information or individual individual trial. This is typical for coming from overall effects, but participant data analysis that participant data; and the analysis aggregate data meta-analysis. some trials providing within-trial combines within and between trial separates within from between trial subgroup information information information, e.g., meta-analysis of interactions*

Comment: Five trials provided within subgroups used for analysis.

**2: For within-trial comparisons, is the effect modification similar from trial to trial?**  Not applicable: no or one within-RCT comparison

Definitely not similar       Probably not similar or unclear       Mostly similar       Definitely similar

*Effect modification reported for two or Effect modification not reported for Effect modification reported for two Effect modification reported for two more trials and clearly different individual trials or too imprecise to or more trials, mostly similar in or more trials, similar in direction, directions tell direction, but considerable only some differences in magnitude differences in magnitude*

Comment: The OR (i.e., the within-trial measure of effect modification) is always in the same direction.

**3: For between-trial comparisons, is the number of trials large?**  Not applicable: no between RCT comparison

Very small       Rather small or unclear       Rather large       Large

*1 or 2 or in smallest subgroup; 5 or less 3-4 in smallest subgroup; 6-10 in 5-9 in smallest subgroup; 11 to 15 in 10 or more in smallest subgroup; in continuous meta-regression continuous meta-regression continuous meta-regression more than 15 in continuous meta-regression*

Comment: Two RTCs is a rather larger number and two RCTs is a rather small number.

**4: Was the direction of effect modification correctly hypothesised a priori?**

Definitely no       Probably no or unclear       Probably yes       Definitely yes

*Clearly post-hoc or results inconsistent Vague hypothesis or hypothesised No prior protocol available but Prior protocol available and includes with hypothesised direction or direction unclear unequivocal statement of a priori correct specification of direction of hypothesis with correct direction of effect modification, e.g., based on a biologically very implausible effect modification biologic rationale*

Comment: No information.

**5: Does a test for interaction suggest that chance is an unlikely explanation of the apparent effect modification?** (consider irrespective of number of effect modifiers)

Chance a very likely explanation       Chance a likely explanation or unclear       Chance may not explain       Chance an unlikely explanation

*Interaction or meta-regression p-value Interaction or meta-regression p- Interaction or meta-regression p- Interaction or meta-regression p- >0.05 value ≤0.05 and >0.01, or no test of value ≤0.01 and >0.005 value ≤0.005 value ≤0.005 interaction reported and not*

---

computable

Comment: The interaction P-value < 0.01.

**6: Did the authors test only a small number of effect modifiers or consider the number in their statistical analysis?**

Definitely no                       Probably no or unclear                       Probably yes                       Definitely yes

*Explicitly exploratory analysis or large number of effect modifiers tested (e.g., greater than 10) and multiplicity not considered in analysis*      *No mention of number or 4-10 effect modifiers tested and number not unequivocal statement of 3 or fewer effect modifiers tested*      *No protocol available but Protocol available and 3 or fewer effect modifiers tested and number not unequivocal statement of 3 or fewer effect modifiers tested or number considered in analysis*

Comment: Two effect modifiers were tested in this review.

**7: Did the authors use a random effects model?**  Not applicable

Definitely no                       Probably no or unclear                       Probably yes                       Definitely yes

*Fixed (or common) effect or fixed effects model explicitly stated*      *Probably fixed effect(s) model*      *Probably random (or mixed) effects*      *Random (or mixed) effects explicitly stated*

Comment: Yes, random effects model for combining the interaction estimates.

**8: If the effect modifier is a continuous variable, were arbitrary cut points avoided?**  not applicable: not continuous

Definitely no                       Probably no or unclear                       Probably yes                       Definitely yes

*Analysis based on exploratory cut point(s), e.g., picking cut point associated with highest interaction p-value*      *Analysis based on cut point(s) of unclear origin*      *Analysis based on pre-specified cut point(s), e.g., suggested by prior RCT continuum, e.g., assuming a linear or logarithmic relationship*

Comment:

**9 Optional: Are there any additional considerations that may increase or decrease credibility?** (manual section 3.9)  not applicable

Yes, probably decrease                       Yes, probably increase  
Biologically implausible  
Expect similar severe critical  
Opposite effects unlikely

Comment:

---

**10: How would you rate the overall credibility of the proposed effect modification?**

The overall rating should be driven by the items that decrease credibility. The following provides a sensible strategy:

- All responses definitely or probably decrease credibility or unclear → very low
- Two or more responses definitely decrease credibility → maximum usually low even if all other responses satisfy credibility criteria
- One response definitely decreases credibility → maximum usually moderate even if all other responses satisfy credibility criteria
- Two responses probably decrease credibility → maximum usually moderate even if all other responses satisfy credibility criteria
- No response options definitely or probably decrease credibility → high very likely

Place a mark on the continuous line (or type "x" in editable version)

---

x



---

**Very low credibility****Low credibility****Moderate credibility****High credibility**

Very likely no effect modification

Likely no effect modification

Likely effect modification

Very likely effect modification

Use overall effect for each  
subgroupUse overall effect for each  
subgroup but note remaining  
uncertaintyUse separate effects for each  
subgroup but note remaining  
uncertaintyUse separate effects for each  
subgroupComment:

---

**eTable 3.9 Credibility assessment of different drugs for Treatment-related adverse event**

**1: Is the analysis of effect modification based on comparison within rather than between trials?**

Completely between       Mostly between or unclear       Mostly within       Completely within

*Subgroup analysis or meta-regression Subgroup analysis or meta- Most trials providing within-trial All trials providing within-trial comparing overall effects of each regression with most information subgroup information; or individual subgroup information or individual individual trial. This is typical for coming from overall effects, but participant data analysis that participant data; and the analysis aggregate data meta-analysis. some trials providing within-trial combines within and between trial separates within from between trial subgroup information information information, e.g., meta-analysis of interactions*

Comment: Five trials provided within subgroups used for analysis.

**2: For within-trial comparisons, is the effect modification similar from trial to trial?**  Not applicable: no or one within-RCT comparison

Definitely not similar       Probably not similar or unclear       Mostly similar       Definitely similar

*Effect modification reported for two or Effect modification not reported for Effect modification reported for two Effect modification reported for two more trials and clearly different individual trials or too imprecise to or more trials, mostly similar in or more trials, similar in direction, directions tell direction, but considerable only some differences in magnitude differences in magnitude*

Comment: The ratio of OR (i.e., the within-trial measure of effect modification) is always in the same direction.

**3: For between-trial comparisons, is the number of trials large?**  Not applicable: no between RCT comparison

Very small       Rather small or unclear       Rather large       Large

*1 or 2 or in smallest subgroup; 5 or less 3-4 in smallest subgroup; 6-10 in 5-9 in smallest subgroup; 11 to 15 in 10 or more in smallest subgroup; in continuous meta-regression continuous meta-regression continuous meta-regression more than 15 in continuous meta-regression*

Comment: Three RTCs is a rather larger number and two RCTs is a rather small number.

**4: Was the direction of effect modification correctly hypothesised a priori?**

Definitely no       Probably no or unclear       Probably yes       Definitely yes

*Clearly post-hoc or results inconsistent Vague hypothesis or hypothesised No prior protocol available but Prior protocol available and includes with hypothesised direction or direction unclear unequivocal statement of a priori correct specification of direction of hypothesis with correct direction of effect modification, e.g., based on a biologically very implausible effect modification biologic rationale*

Comment: No information.

**5: Does a test for interaction suggest that chance is an unlikely explanation of the apparent effect modification?** (consider irrespective of number of effect modifiers)

Chance a very likely explanation       Chance a likely explanation or unclear       Chance may not explain       Chance an unlikely explanation

*Interaction or meta-regression p-value Interaction or meta-regression p- Interaction or meta-regression p- Interaction or meta-regression p- >0.05 value ≤0.05 and >0.01, or no test of value ≤0.01 and >0.005 value ≤0.005 value ≤0.005 interaction reported and not*

---

computable

Comment: The interaction P-value < 0.01.

**6: Did the authors test only a small number of effect modifiers or consider the number in their statistical analysis?**

Definitely no                       Probably no or unclear                       Probably yes                       Definitely yes

*Explicitly exploratory analysis or large No mention of number or 4-10 effect No protocol available but Protocol available and 3 or fewer number of effect modifiers tested modifiers tested and number not unequivocal statement of 3 or fewer effect modifiers tested or number (e.g., greater than 10) and multiplicity considered in analysis effect modifiers tested considered in analysis not considered in analysis*

Comment: Two effect modifiers were tested in this review.

**7: Did the authors use a random effects model?**  Not applicable

Definitely no                       Probably no or unclear                       Probably yes                       Definitely yes

*Fixed (or common) effect or fixed Probably fixed effect(s) model Probably random (or mixed) effects Random (or mixed) effects explicitly effects model explicitly stated stated*

Comment: Yes, random effects model for combining the interaction estimates.

**8: If the effect modifier is a continuous variable, were arbitrary cut points avoided?**  not applicable: not continuous

Definitely no                       Probably no or unclear                       Probably yes                       Definitely yes

*Analysis based on exploratory cut Analysis based on cut point(s) of Analysis based on pre-specified cut Analysis based on the full point(s), e.g., picking cut point unclear origin point(s), e.g., suggested by prior RCT continuum, e.g., assuming a linear associated with highest interaction p- value or logarithmic relationship*

Comment:

**9 Optional: Are there any additional considerations that may increase or decrease credibility?** (manual section 3.9)  not applicable

Yes, probably decrease                       Yes, probably increase  
Biologically implausible  
Expect similar severe critical  
Opposite effects unlikely

Comment:

---

**10: How would you rate the overall credibility of the proposed effect modification?**

The overall rating should be driven by the items that decrease credibility. The following provides a sensible strategy:

- All responses definitely or probably decrease credibility or unclear → very low
- Two or more responses definitely decrease credibility → maximum usually low even if all other responses satisfy credibility criteria
- One response definitely decreases credibility → maximum usually moderate even if all other responses satisfy credibility criteria
- Two responses probably decrease credibility → maximum usually moderate even if all other responses satisfy credibility criteria
- No response options definitely or probably decrease credibility → high very likely

Place a mark on the continuous line (or type “x” in editable version)

---

X

---

**Very low credibility****Low credibility****Moderate credibility****High credibility**

Very likely no effect modification

Likely no effect modification

Likely effect modification

Very likely effect modification

Use overall effect for each  
subgroupUse overall effect for each  
subgroup but note remaining  
uncertaintyUse separate effects for each  
subgroup but note remaining  
uncertaintyUse separate effects for each  
subgroupComment:

---

**eTable 3.10 Credibility assessment of route of administration for Sever adverse event**

**1: Is the analysis of effect modification based on comparison within rather than between trials?**

Completely between       Mostly between or unclear       Mostly within       Completely within

*Subgroup analysis or meta-regression Subgroup analysis or meta- Most trials providing within-trial All trials providing within-trial comparing overall effects of each regression with most information subgroup information; or individual subgroup information or individual individual trial. This is typical for coming from overall effects, but participant data analysis that participant data; and the analysis aggregate data meta-analysis. some trials providing within-trial combines within and between trial separates within from between trial subgroup information information information, e.g., meta-analysis of interactions*

Comment: Five trials provided within subgroups used for analysis.

**2: For within-trial comparisons, is the effect modification similar from trial to trial?**  Not applicable: no or one within-RCT comparison

Definitely not similar       Probably not similar or unclear       Mostly similar       Definitely similar

*Effect modification reported for two or Effect modification not reported for Effect modification reported for two Effect modification reported for two more trials and clearly different individual trials or too imprecise to or more trials, mostly similar in or more trials, similar in direction, directions tell direction, but considerable only some differences in magnitude differences in magnitude*

Comment: The OR (i.e., the within-trial measure of effect modification) is always in the same direction.

**3: For between-trial comparisons, is the number of trials large?**  Not applicable: no between RCT comparison

Very small       Rather small or unclear       Rather large       Large

*1 or 2 or in smallest subgroup; 5 or less 3-4 in smallest subgroup; 6-10 in 5-9 in smallest subgroup; 11 to 15 in 10 or more in smallest subgroup; in continuous meta-regression continuous meta-regression continuous meta-regression more than 15 in continuous meta-regression*

Comment: Two RTCs is a rather larger number and two RCTs is a rather small number.

**4: Was the direction of effect modification correctly hypothesised a priori?**

Definitely no       Probably no or unclear       Probably yes       Definitely yes

*Clearly post-hoc or results inconsistent Vague hypothesis or hypothesised No prior protocol available but Prior protocol available and includes with hypothesised direction or direction unclear unequivocal statement of a priori correct specification of direction of hypothesis with correct direction of effect modification, e.g., based on a biologically very implausible effect modification biologic rationale*

Comment: No information.

**5: Does a test for interaction suggest that chance is an unlikely explanation of the apparent effect modification?** (consider irrespective of number of effect modifiers)

Chance a very likely explanation       Chance a likely explanation or unclear       Chance may not explain       Chance an unlikely explanation

*Interaction or meta-regression p-value Interaction or meta-regression p- Interaction or meta-regression p- Interaction or meta-regression p- >0.05 value ≤0.05 and >0.01, or no test of value ≤0.01 and >0.005 value ≤0.005 value ≤0.005 interaction reported and not*

---

computable

Comment: The interaction P-value < 0.01.

**6: Did the authors test only a small number of effect modifiers or consider the number in their statistical analysis?**

Definitely no                       Probably no or unclear                       Probably yes                       Definitely yes

*Explicitly exploratory analysis or large number of effect modifiers tested (e.g., greater than 10) and multiplicity not considered in analysis*      *No mention of number or 4-10 effect modifiers tested and number not unequivocal statement of 3 or fewer effect modifiers tested*      *No protocol available but Protocol available and 3 or fewer effect modifiers tested and number not unequivocal statement of 3 or fewer effect modifiers tested or number considered in analysis*

Comment: Two effect modifiers were tested in this review.

**7: Did the authors use a random effects model?**  Not applicable

Definitely no                       Probably no or unclear                       Probably yes                       Definitely yes

*Fixed (or common) effect or fixed effects model explicitly stated*      *Probably fixed effect(s) model*      *Probably random (or mixed) effects*      *Random (or mixed) effects explicitly stated*

Comment: Yes, random effects model for combining the interaction estimates.

**8: If the effect modifier is a continuous variable, were arbitrary cut points avoided?**  not applicable: not continuous

Definitely no                       Probably no or unclear                       Probably yes                       Definitely yes

*Analysis based on exploratory cut point(s), e.g., picking cut point associated with highest interaction p-value*      *Analysis based on cut point(s) of unclear origin*      *Analysis based on pre-specified cut point(s), e.g., suggested by prior RCT continuum, e.g., assuming a linear or logarithmic relationship*

Comment:

**9 Optional: Are there any additional considerations that may increase or decrease credibility?** (manual section 3.9)  not applicable

Yes, probably decrease                       Yes, probably increase  
Biologically implausible  
Expect similar severe critical  
Opposite effects unlikely

Comment:

---

**10: How would you rate the overall credibility of the proposed effect modification?**

The overall rating should be driven by the items that decrease credibility. The following provides a sensible strategy:

- All responses definitely or probably decrease credibility or unclear → very low
- Two or more responses definitely decrease credibility → maximum usually low even if all other responses satisfy credibility criteria
- One response definitely decreases credibility → maximum usually moderate even if all other responses satisfy credibility criteria
- Two responses probably decrease credibility → maximum usually moderate even if all other responses satisfy credibility criteria
- No response options definitely or probably decrease credibility → high very likely

Place a mark on the continuous line (or type "x" in editable version)

---

x

---

**Very low credibility****Low credibility****Moderate credibility****High credibility**

Very likely no effect modification

Likely no effect modification

Likely effect modification

Very likely effect modification

Use overall effect for each  
subgroupUse overall effect for each  
subgroup but note remaining  
uncertaintyUse separate effects for each  
subgroup but note remaining  
uncertaintyUse separate effects for each  
subgroupComment:

---

**Table 3.11 Credibility assessment of different drugs for Severe adverse event**

**1: Is the analysis of effect modification based on comparison within rather than between trials?**

Completely between       Mostly between or unclear       Mostly within       Completely within

*Subgroup analysis or meta-regression comparing overall effects of each regression with most aggregate data meta-analysis. Subgroup analysis or meta- Most trials providing within-trial information subgroup information; or individual subgroup information or individual trial. This is typical for coming from overall effects, but participant data analysis that participant data; and the analysis some trials providing within-trial combines within and between trial separates within from between trial subgroup information information information, e.g., meta-analysis of interactions*

Comment: Five trials provided within subgroups used for analysis.

**2: For within-trial comparisons, is the effect modification similar from trial to trial?**  Not applicable: no or one within-RCT comparison

Definitely not similar       Probably not similar or unclear       Mostly similar       Definitely similar

*Effect modification reported for two or more trials and clearly different directions Effect modification not reported for two or more trials, mostly similar in directions tell Effect modification reported for two or more trials, similar in direction, but considerable only some differences in magnitude Effect modification reported for two or more trials, similar in direction, but considerable only some differences in magnitude differences in magnitude*

Comment: The ratio of OR (i.e., the within-trial measure of effect modification) is always in the same direction.

**3: For between-trial comparisons, is the number of trials large?**  Not applicable: no between RCT comparison

Very small       Rather small or unclear       Rather large       Large

*1 or 2 or in smallest subgroup; 5 or less in continuous meta-regression 3-4 in smallest subgroup; 6-10 in continuous meta-regression 5-9 in smallest subgroup; 11 to 15 in continuous meta-regression 10 or more in smallest subgroup; more than 15 in continuous meta-regression*

Comment: Three RTCs is a rather larger number and two RCTs is a rather small number.

**4: Was the direction of effect modification correctly hypothesised a priori?**

Definitely no       Probably no or unclear       Probably yes       Definitely yes

*Clearly post-hoc or results inconsistent with biologically very implausible Vague hypothesis or hypothesised direction unclear No prior protocol available but unequivocal statement of a priori correct specification of direction of hypothesis with correct direction of effect modification, e.g., based on a effect modification Prior protocol available and includes unequivocal statement of a priori correct specification of direction of hypothesis with correct direction of effect modification, e.g., based on a biologic rationale*

Comment: No information.

**5: Does a test for interaction suggest that chance is an unlikely explanation of the apparent effect modification?** (consider irrespective of number of effect modifiers)

Chance a very likely explanation >0.05       Chance a likely explanation interaction reported and not computable       Chance may not explain value ≤0.01 and >0.005       Chance an unlikely explanation value ≤0.005

Comment: The interaction P-value < 0.01.



**6: Did the authors test only a small number of effect modifiers or consider the number in their statistical analysis?**

Definitely no                       Probably no or unclear                       Probably yes                       Definitely yes

*Explicitly exploratory analysis or large number of effect modifiers tested (e.g., greater than 10) and multiplicity not considered in analysis*      *No mention of number or 4-10 effect modifiers tested and number not unequivocal statement of 3 or fewer effect modifiers tested*      *No protocol available but Protocol available and 3 or fewer effect modifiers tested and number not unequivocal statement of 3 or fewer effect modifiers tested or number considered in analysis*

Comment: Two effect modifiers were tested in this review.

**7: Did the authors use a random effects model?**  Not applicable

Definitely no                       Probably no or unclear                       Probably yes                       Definitely yes

*Fixed (or common) effect or fixed effects model explicitly stated*      *Probably fixed effect(s) model*      *Probably random (or mixed) effects*      *Random (or mixed) effects explicitly stated*

Comment: Yes, random effects model for combining the interaction estimates.

**8: If the effect modifier is a continuous variable, were arbitrary cut points avoided?**  not applicable: not continuous

Definitely no                       Probably no or unclear                       Probably yes                       Definitely yes

*Analysis based on exploratory cut point(s), e.g., picking cut point associated with highest interaction p-value*      *Analysis based on cut point(s) of unclear origin*      *Analysis based on pre-specified cut point(s), e.g., suggested by prior RCT continuum, e.g., assuming a linear or logarithmic relationship*

Comment:

**9 Optional: Are there any additional considerations that may increase or decrease credibility?** (manual section 3.9)  not applicable

- Yes, probably decrease Biologically implausible
- Yes, probably increase Expect similar severe critical
- Opposite effects unlikely

Comment:

**10: How would you rate the overall credibility of the proposed effect modification?**

The overall rating should be driven by the items that decrease credibility. The following provides a sensible strategy:

- All responses definitely or probably decrease credibility or unclear → very low
- Two or more responses definitely decrease credibility → maximum usually low even if all other responses satisfy credibility criteria
- One response definitely decreases credibility → maximum usually moderate even if all other responses satisfy credibility criteria
- Two responses probably decrease credibility → maximum usually moderate even if all other responses satisfy credibility criteria
- No response options definitely or probably decrease credibility → high very likely

Place a mark on the continuous line (or type “x” in editable version)

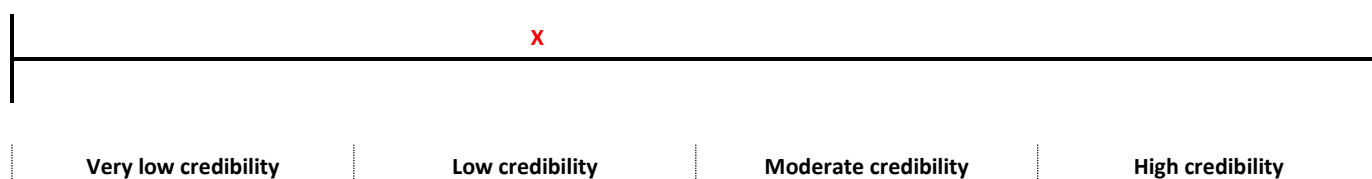

---

Very likely no effect modification  
Use overall effect for each  
subgroup

Likely no effect modification  
Use overall effect for each  
subgroup but note remaining  
uncertainty

Likely effect modification  
Use separate effects for each  
subgroup but note remaining  
uncertainty

Very likely effect modification  
Use separate effects for each  
subgroup

Comment:

---

**Table 3.12 Credibility assessment of route of administration for discontinuation due to adverse event**

**1: Is the analysis of effect modification based on comparison within rather than between trials?**

Completely between       Mostly between or unclear       Mostly within       Completely within

*Subgroup analysis or meta-regression comparing overall effects of each regression with most aggregate data meta-analysis. Subgroup analysis or meta- Most trials providing within-trial information; or individual subgroup information or individual trial. This is typical for coming from overall effects, but participant data analysis that participant data; and the analysis some trials providing within-trial combines within and between trial separates within from between trial subgroup information information information, e.g., meta-analysis of interactions*

Comment: Five trials provided within subgroups used for analysis.

**2: For within-trial comparisons, is the effect modification similar from trial to trial?**  Not applicable: no or one within-RCT comparison

Definitely not similar       Probably not similar or unclear       Mostly similar       Definitely similar

*Effect modification reported for two or more trials and clearly different directions Effect modification not reported for two or more trials, mostly similar in directions tell Effect modification reported for two or more trials, similar in direction, but considerable only some differences in magnitude Effect modification reported for two or more trials, similar in direction differences in magnitude*

Comment: The OR (i.e., the within-trial measure of effect modification) is always in the same direction.

**3: For between-trial comparisons, is the number of trials large?**  Not applicable: no between RCT comparison

Very small       Rather small or unclear       Rather large       Large

*1 or 2 or in smallest subgroup; 5 or less in continuous meta-regression 3-4 in smallest subgroup; 6-10 in continuous meta-regression 5-9 in smallest subgroup; 11 to 15 in continuous meta-regression 10 or more in smallest subgroup; more than 15 in continuous meta-regression*

Comment: Two RTCs is a rather larger number and two RCTs is a rather small number.

**4: Was the direction of effect modification correctly hypothesised a priori?**

Definitely no       Probably no or unclear       Probably yes       Definitely yes

*Clearly post-hoc or results inconsistent with biologically very implausible Vague hypothesis or hypothesised direction unclear No prior protocol available but unequivocal statement of a priori correct specification of direction of hypothesis with correct direction of effect modification, e.g., based on a biologic rationale Prior protocol available and includes*

Comment: No information.

**5: Does a test for interaction suggest that chance is an unlikely explanation of the apparent effect modification?** (consider irrespective of number of effect modifiers)

Chance a very likely explanation >0.05       Chance a likely explanation interaction reported and not computable       Chance may not explain value ≤0.01 and >0.005       Chance an unlikely explanation value ≤0.005

Comment: The interaction P-value < 0.01.

**6: Did the authors test only a small number of effect modifiers or consider the number in their statistical analysis?**

Definitely no                       Probably no or unclear                       Probably yes                       Definitely yes

*Explicitly exploratory analysis or large number of effect modifiers tested (e.g., greater than 10) and multiplicity not considered in analysis*      *No mention of number or 4-10 effect modifiers tested and number not unequivocal statement of 3 or fewer effect modifiers tested*      *No protocol available but Protocol available and 3 or fewer effect modifiers tested and number not unequivocal statement of 3 or fewer effect modifiers tested or number considered in analysis*

Comment: Two effect modifiers were tested in this review.

**7: Did the authors use a random effects model?**  Not applicable

Definitely no                       Probably no or unclear                       Probably yes                       Definitely yes

*Fixed (or common) effect or fixed effects model explicitly stated*      *Probably fixed effect(s) model*      *Probably random (or mixed) effects*      *Random (or mixed) effects explicitly stated*

Comment: Yes, random effects model for combining the interaction estimates.

**8: If the effect modifier is a continuous variable, were arbitrary cut points avoided?**  not applicable: not continuous

Definitely no                       Probably no or unclear                       Probably yes                       Definitely yes

*Analysis based on exploratory cut point(s), e.g., picking cut point associated with highest interaction p-value*      *Analysis based on cut point(s) of unclear origin*      *Analysis based on pre-specified cut point(s), e.g., suggested by prior RCT*      *Analysis based on the full continuum, e.g., assuming a linear or logarithmic relationship*

Comment:

**9 Optional: Are there any additional considerations that may increase or decrease credibility?** (manual section 3.9)  not applicable

- Yes, probably decrease Biologically implausible
- Yes, probably increase Expect similar severe critical
- Opposite effects unlikely

Comment:

**10: How would you rate the overall credibility of the proposed effect modification?**

The overall rating should be driven by the items that decrease credibility. The following provides a sensible strategy:

- All responses definitely or probably decrease credibility or unclear → very low
- Two or more responses definitely decrease credibility → maximum usually low even if all other responses satisfy credibility criteria
- One response definitely decreases credibility → maximum usually moderate even if all other responses satisfy credibility criteria
- Two responses probably decrease credibility → maximum usually moderate even if all other responses satisfy credibility criteria
- No response options definitely or probably decrease credibility → high very likely

Place a mark on the continuous line (or type "x" in editable version)

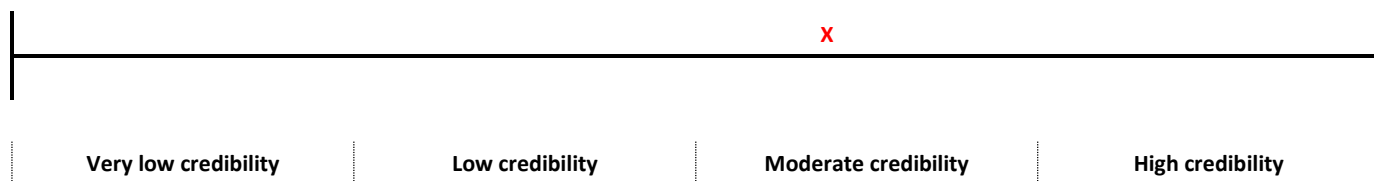

---

Very likely no effect modification  
Use overall effect for each  
subgroup

Likely no effect modification  
Use overall effect for each  
subgroup but note remaining  
uncertainty

Likely effect modification  
Use separate effects for each  
subgroup but note remaining  
uncertainty

Very likely effect modification  
Use separate effects for each  
subgroup

Comment:

---

**eTable 3.13 Credibility assessment of different drugs for discontinuation due to adverse event**

**1: Is the analysis of effect modification based on comparison within rather than between trials?**

Completely between       Mostly between or unclear       Mostly within       Completely within

*Subgroup analysis or meta-regression Subgroup analysis or meta- Most trials providing within-trial All trials providing within-trial comparing overall effects of each regression with most information subgroup information; or individual subgroup information or individual individual trial. This is typical for coming from overall effects, but participant data analysis that participant data; and the analysis aggregate data meta-analysis. some trials providing within-trial combines within and between trial separates within from between trial subgroup information information information, e.g., meta-analysis of interactions*

Comment: Five trials provided within subgroups used for analysis.

**2: For within-trial comparisons, is the effect modification similar from trial to trial?**  Not applicable: no or one within-RCT comparison

Definitely not similar       Probably not similar or unclear       Mostly similar       Definitely similar

*Effect modification reported for two or Effect modification not reported for Effect modification reported for two Effect modification reported for two more trials and clearly different individual trials or too imprecise to or more trials, mostly similar in or more trials, similar in direction, directions tell direction, but considerable only some differences in magnitude differences in magnitude*

Comment: The ratio of OR (i.e., the within-trial measure of effect modification) is always in the same direction.

**3: For between-trial comparisons, is the number of trials large?**  Not applicable: no between RCT comparison

Very small       Rather small or unclear       Rather large       Large

*1 or 2 or in smallest subgroup; 5 or less 3-4 in smallest subgroup; 6-10 in 5-9 in smallest subgroup; 11 to 15 in 10 or more in smallest subgroup; in continuous meta-regression continuous meta-regression continuous meta-regression more than 15 in continuous meta-regression*

Comment: Three RTCs is a rather larger number and two RCTs is a rather small number.

**4: Was the direction of effect modification correctly hypothesised a priori?**

Definitely no       Probably no or unclear       Probably yes       Definitely yes

*Clearly post-hoc or results inconsistent Vague hypothesis or hypothesised No prior protocol available but Prior protocol available and includes with hypothesised direction or direction unclear unequivocal statement of a priori correct specification of direction of hypothesis with correct direction of effect modification, e.g., based on a biologically very implausible effect modification biologic rationale*

Comment: No information.

**5: Does a test for interaction suggest that chance is an unlikely explanation of the apparent effect modification?** (consider irrespective of number of effect modifiers)

Chance a very likely explanation       Chance a likely explanation or unclear       Chance may not explain       Chance an unlikely explanation

*Interaction or meta-regression p-value Interaction or meta-regression p- Interaction or meta-regression p- Interaction or meta-regression p- >0.05 value ≤0.05 and >0.01, or no test of value ≤0.01 and >0.005 value ≤0.005 value ≤0.005 interaction reported and not*

---

computable

Comment: The interaction P-value < 0.01.

**6: Did the authors test only a small number of effect modifiers or consider the number in their statistical analysis?**

Definitely no                       Probably no or unclear                       Probably yes                       Definitely yes

*Explicitly exploratory analysis or large number of effect modifiers tested (e.g., greater than 10) and multiplicity not considered in analysis*      *No mention of number or 4-10 effect modifiers tested and number not unequivocal statement of 3 or fewer effect modifiers tested*      *No protocol available but Protocol available and 3 or fewer effect modifiers tested and number considered in analysis*

Comment: Two effect modifiers were tested in this review.

**7: Did the authors use a random effects model?**  Not applicable

Definitely no                       Probably no or unclear                       Probably yes                       Definitely yes

*Fixed (or common) effect or fixed effects model explicitly stated*      *Probably fixed effect(s) model*      *Probably random (or mixed) effects*      *Random (or mixed) effects explicitly stated*

Comment: Yes, random effects model for combining the interaction estimates.

**8: If the effect modifier is a continuous variable, were arbitrary cut points avoided?**  not applicable: not continuous

Definitely no                       Probably no or unclear                       Probably yes                       Definitely yes

*Analysis based on exploratory cut point(s), e.g., picking cut point associated with highest interaction p-value*      *Analysis based on cut point(s) of unclear origin*      *Analysis based on pre-specified cut point(s), e.g., suggested by prior RCT continuum, e.g., assuming a linear or logarithmic relationship*

Comment:

**9 Optional: Are there any additional considerations that may increase or decrease credibility?** (manual section 3.9)  not applicable

Yes, probably decrease                       Yes, probably increase  
Biologically implausible  
Expect similar severe critical  
Opposite effects unlikely

Comment:

---

**10: How would you rate the overall credibility of the proposed effect modification?**

The overall rating should be driven by the items that decrease credibility. The following provides a sensible strategy:

- All responses definitely or probably decrease credibility or unclear → very low
- Two or more responses definitely decrease credibility → maximum usually low even if all other responses satisfy credibility criteria
- One response definitely decreases credibility → maximum usually moderate even if all other responses satisfy credibility criteria
- Two responses probably decrease credibility → maximum usually moderate even if all other responses satisfy credibility criteria
- No response options definitely or probably decrease credibility → high very likely

Place a mark on the continuous line (or type “x” in editable version)

X

---

**Very low credibility****Low credibility****Moderate credibility****High credibility**

Very likely no effect modification

Likely no effect modification

Likely effect modification

Very likely effect modification

Use overall effect for each  
subgroupUse overall effect for each  
subgroup but note remaining  
uncertaintyUse separate effects for each  
subgroup but note remaining  
uncertaintyUse separate effects for each  
subgroupComment:

---



**eFigure 1 Subgroup analysis by route of administration of JAK inhibitors versus placebo on change from baseline of SALT scores**

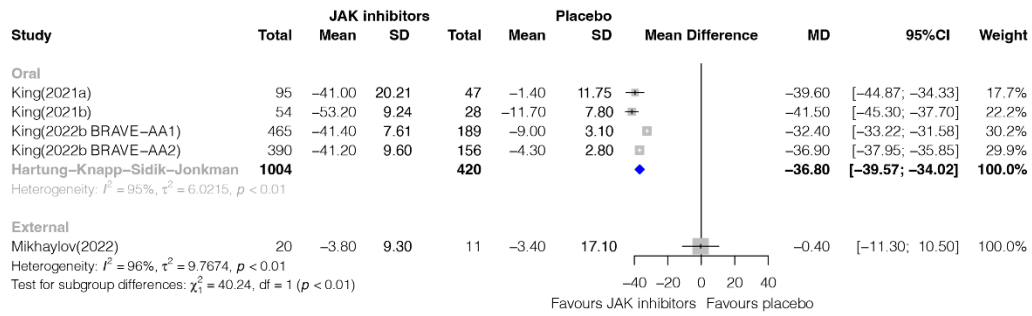

**eFigure 2 Subgroup analysis by different drugs of JAK inhibitors versus placebo on change from baseline of SALT scores**

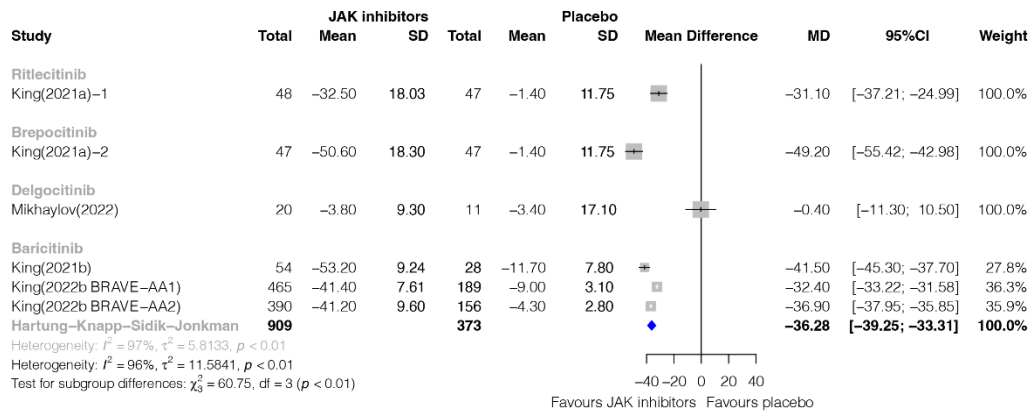

**eFigure 3 Subgroup analysis by route of administration of JAK inhibitors versus placebo on SALT 50**

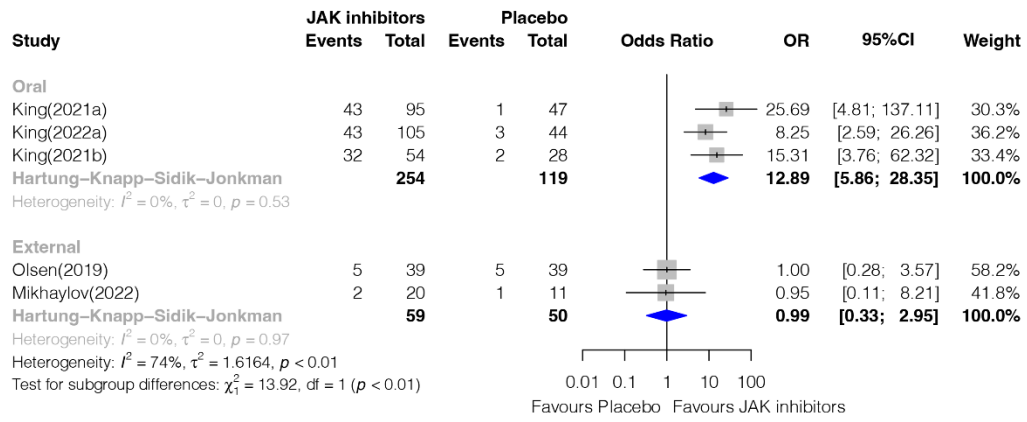

**eFigure 4 Subgroup analysis by different drugs of JAK inhibitors versus placebo on SALT 50**

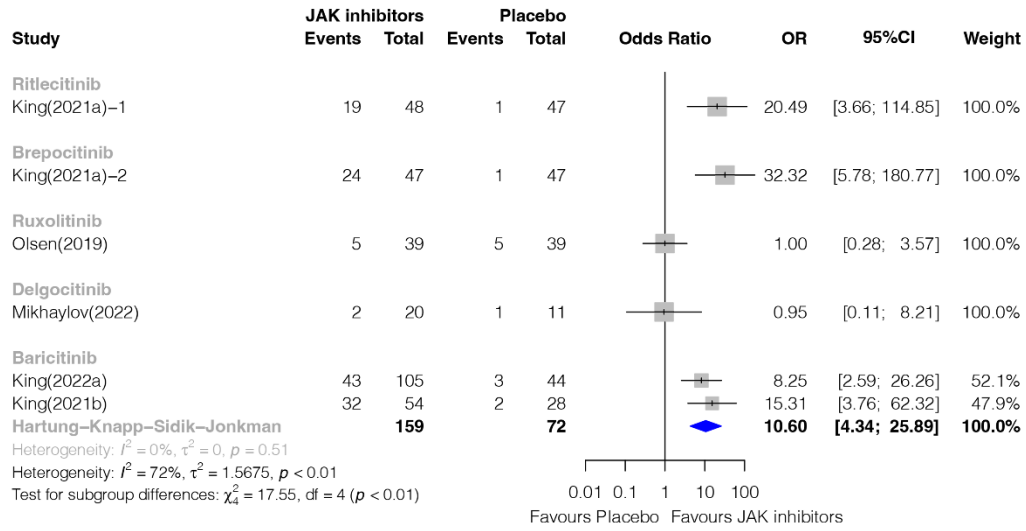

**eFigure 5 Subgroup analysis by route of administration of JAK inhibitors versus placebo on SALT 90**

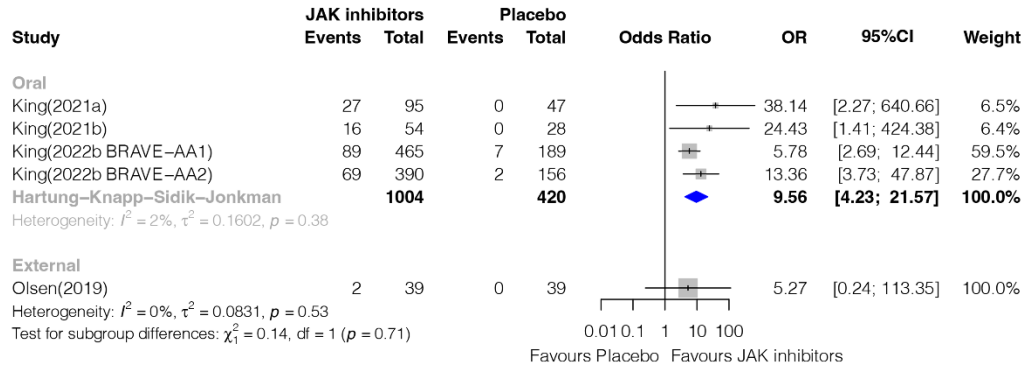

**eFigure 6 Subgroup analysis by different drugs of JAK inhibitors versus placebo on SALT 90**

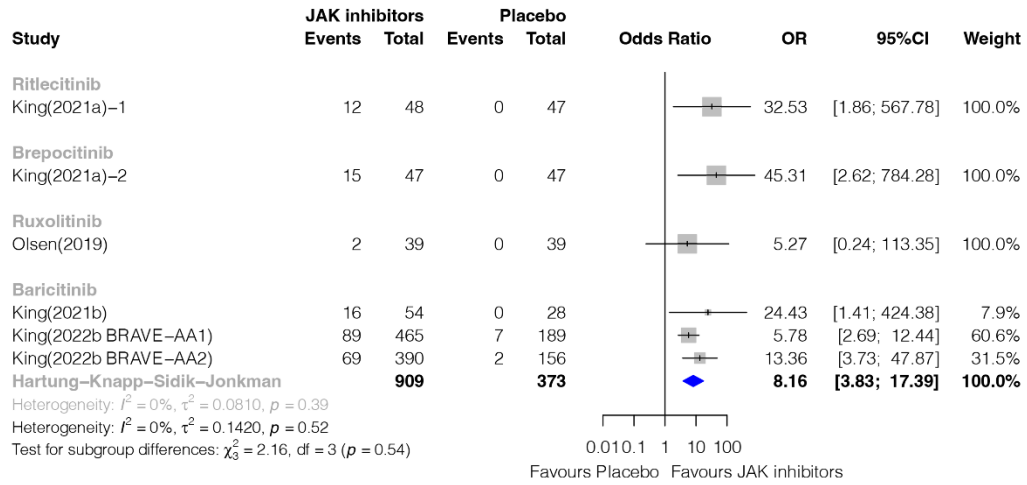

**eFigure 7 Subgroup analysis by different drugs of JAK inhibitors versus placebo on SALT score  $\leq 20$**

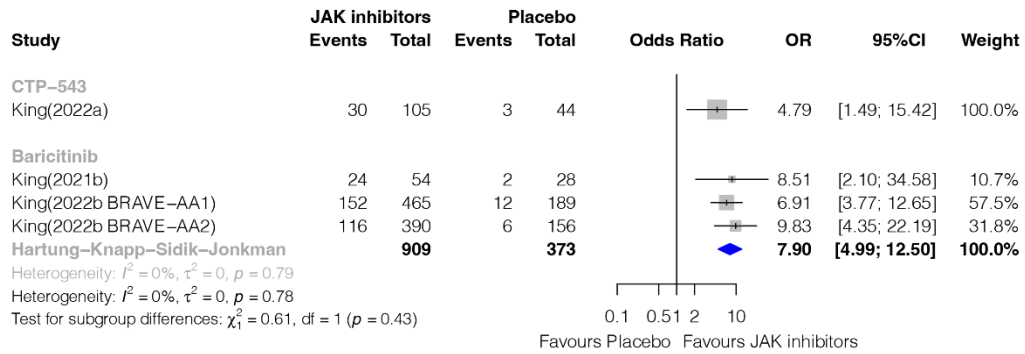

**eFigure 8 Subgroup analysis by route of administration of JAK inhibitors versus placebo on Treatment-related adverse event**

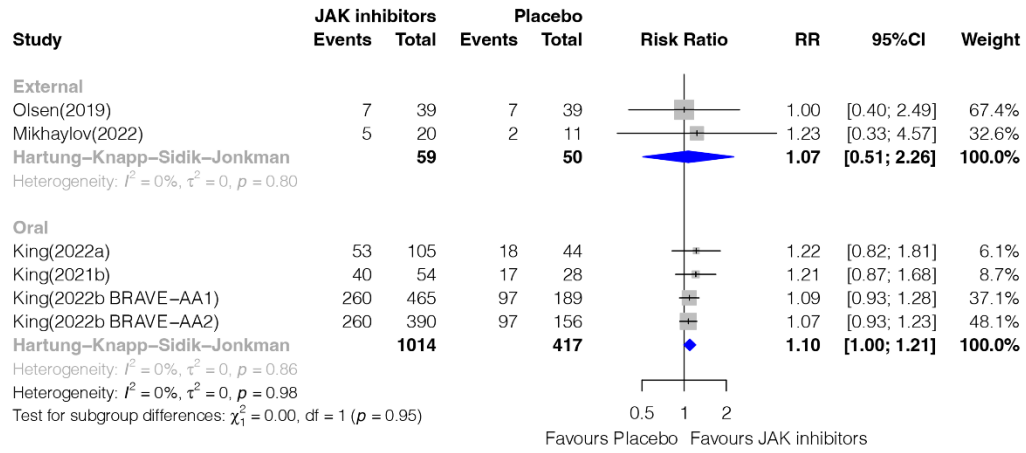



**eFigure 9 Subgroup analysis by different drugs of JAK inhibitors versus placebo on Treatment-related adverse event**

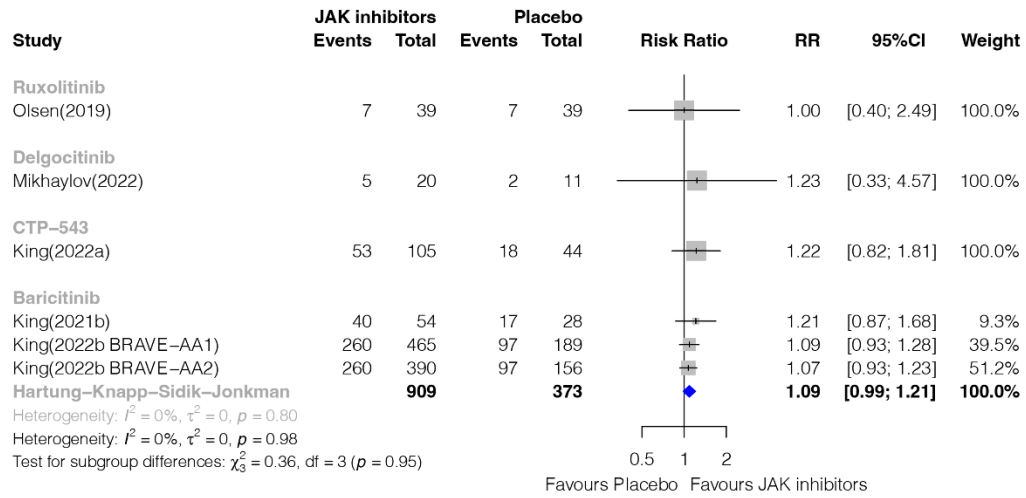

**eFigure 10 Subgroup analysis by route of administration of JAK inhibitors versus placebo on severe adverse event**

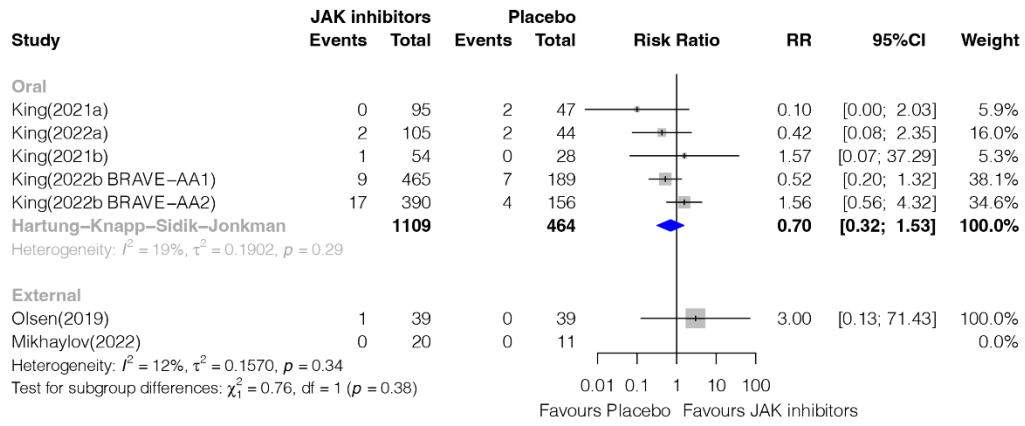

**eFigure 11 Subgroup analysis by different drugs of JAK inhibitors versus placebo on severe adverse event**

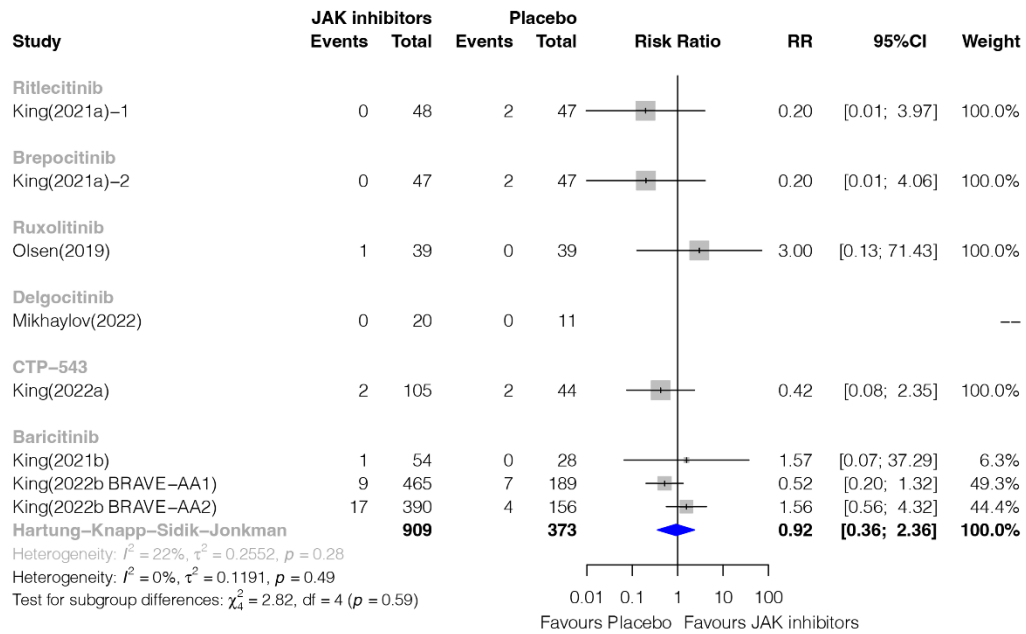

**eFigure 12 Subgroup analysis by route of administration of JAK inhibitors versus placebo on discontinuation due to adverse event**

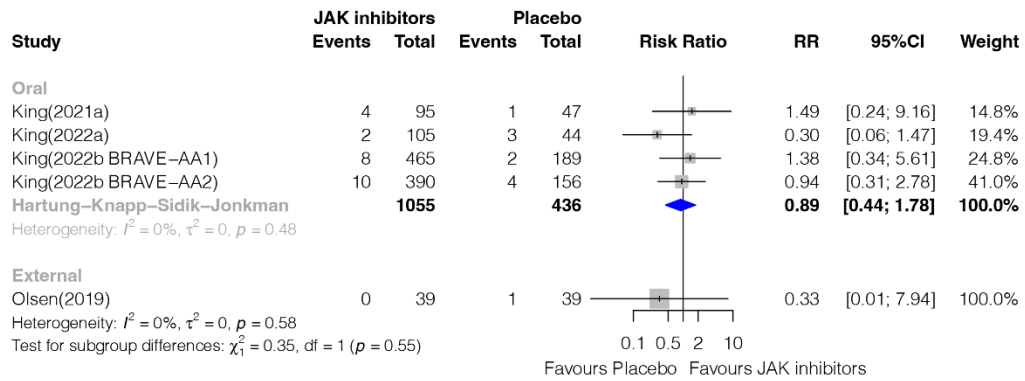

**eFigure 13 Subgroup analysis by different drugs of JAK inhibitors versus placebo on discontinuation due to adverse event**

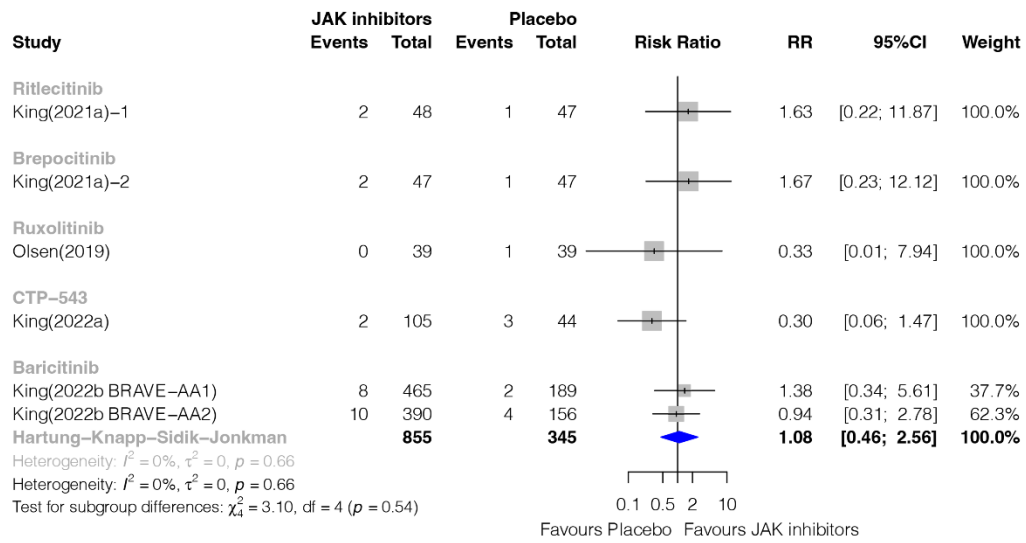

**eFigure 14 Sensitivity analysis for change from baseline of SALT scores used the DerSimonian-Laird random effect model**

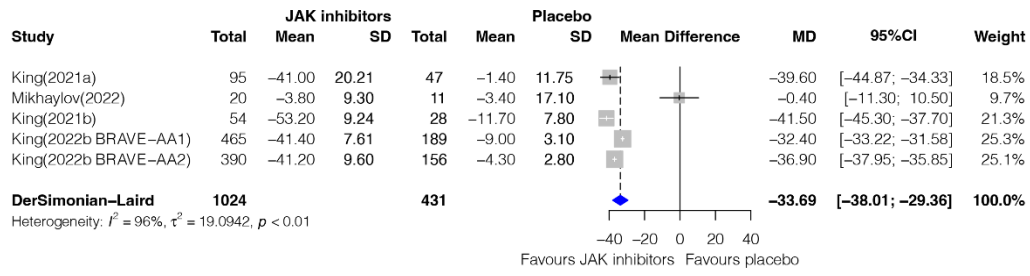

**eFigure 15 Sensitivity analysis for SALT scores (SALT 50, SALT 90, SALT score ≤ 10 and SALT score ≤ 20) used the DerSimonian-Laird random effect model**

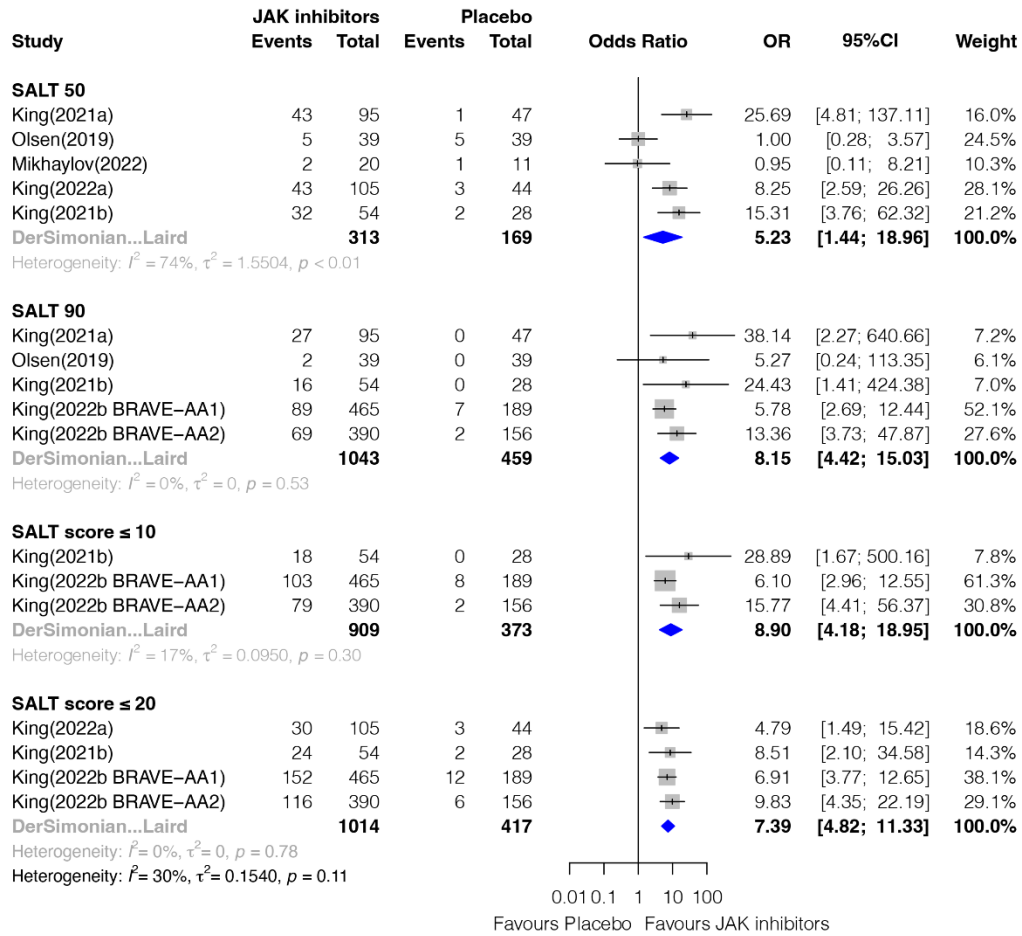

**eFigure 16 Sensitivity analysis for safety used the DerSimonian-Laird random effect model**

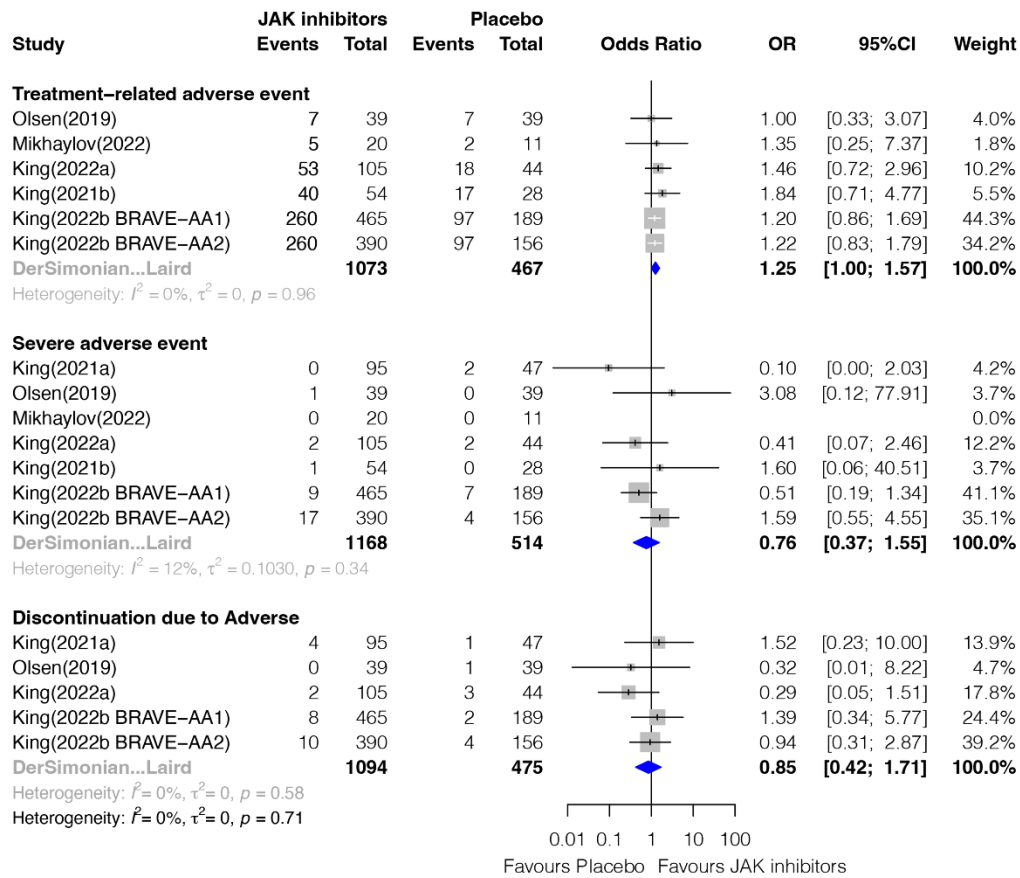



**eFigure 17 Sensitivity analysis for change from baseline of SALT scores after excluded high risk bias of studies**

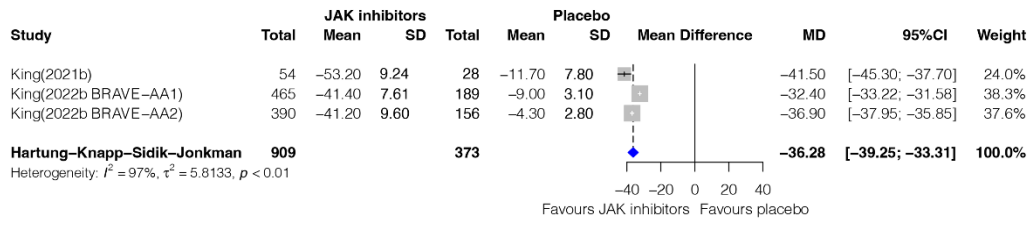

**eFigure 18 Sensitivity analysis for SALT scores (SALT 50, SALT 90, SALT score ≤ 10 and SALT score ≤ 20) after excluded high risk bias of studies**

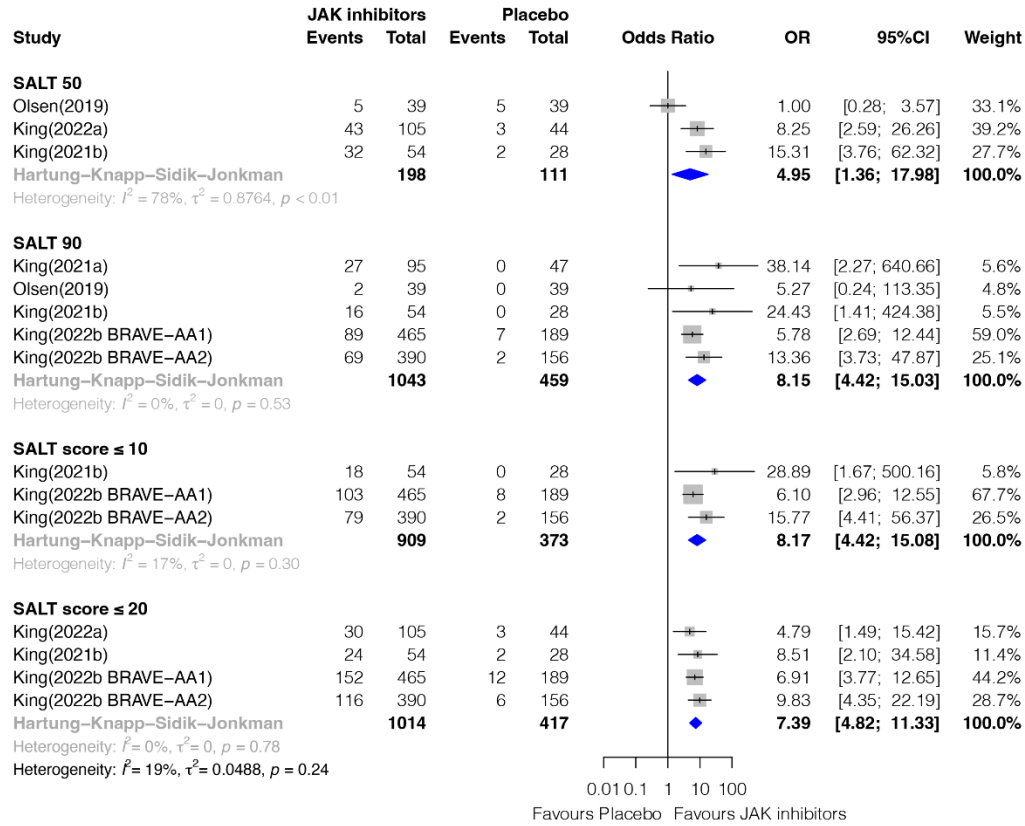

**eFigure 19 Sensitivity analysis for safety after excluded high risk bias of studies**

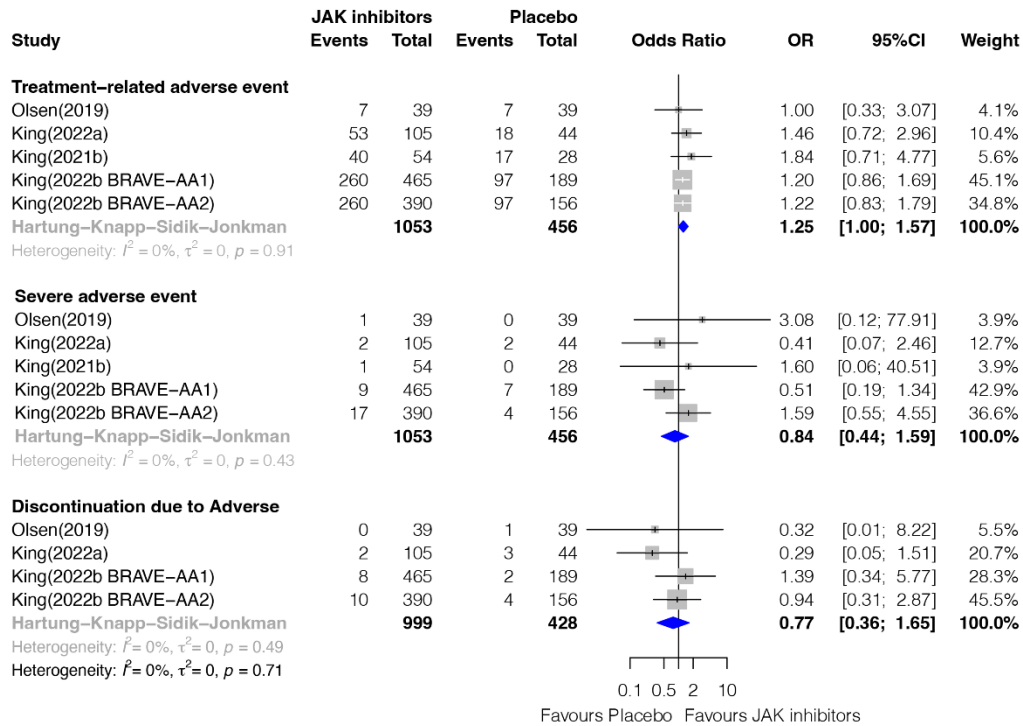

**eFigure 20 Sensitivity analysis for SALT scores (SALT 50, SALT 90, SALT score ≤ 10 and SALT score ≤ 20) after excluded zero-events studies**

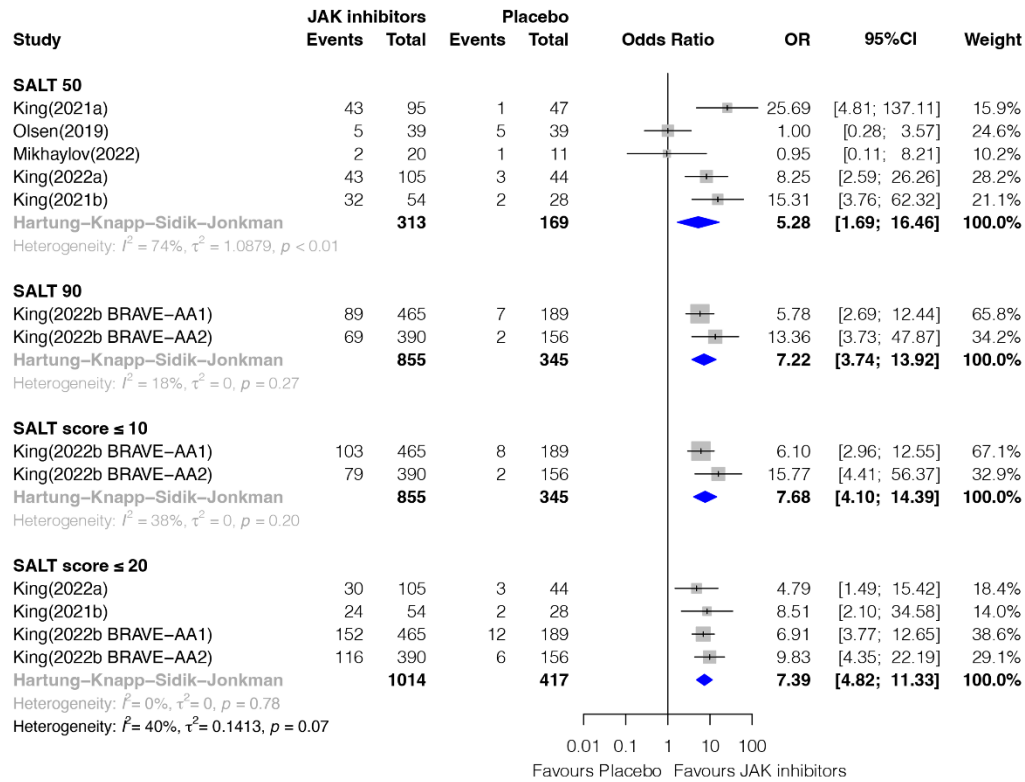

**eFigure 21 Sensitivity analysis for safety after excluded zero-events studies**

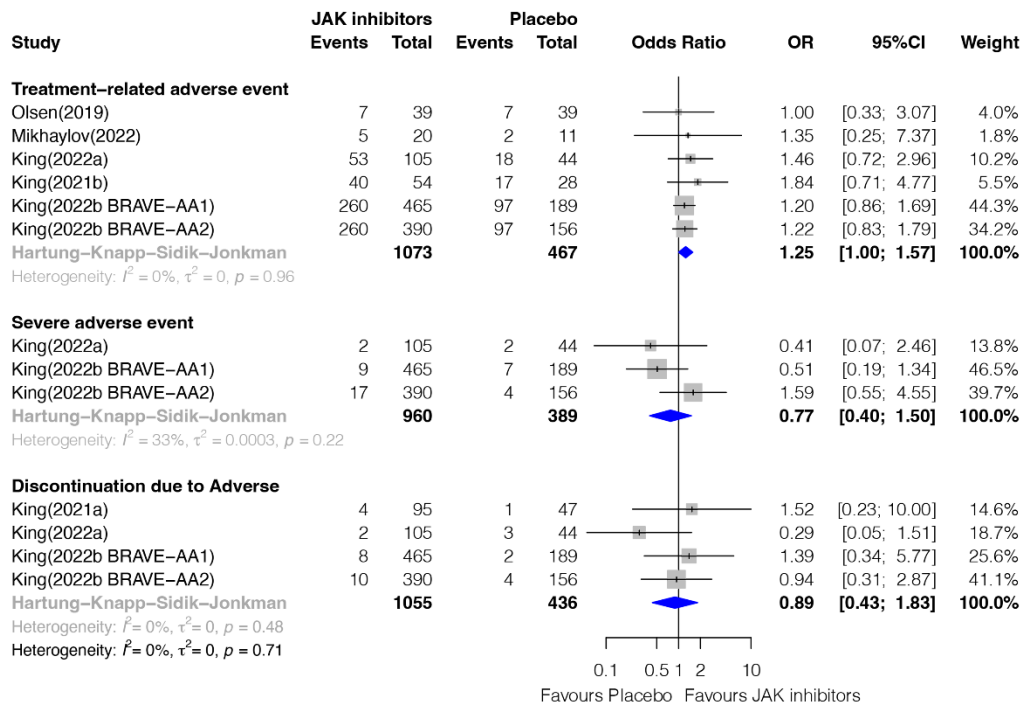

Supplement: jamanetwopen-e2320351-s001.pdf [file jamanetwopen-e2320351-s001.pdf]
