# Supplementary material for: Janus Kinase Inhibitors for Alopecia Areata: A Systematic Review and Meta-Analysis
Source: PubMed Central journal article supplement (PMC10300710; doi:10.1001/jamanetworkopen.2023.20351), 2023-06-27
Supplement: jamanetwopen-e2320351-s002.pdf [file jamanetwopen-e2320351-s002.pdf]

## Data Sharing Statement

Liu. Janus Kinase Inhibitors for Alopecia Areata. *JAMA Netw Open*. Published June 27, 2023.  
doi:10.1001/jamanetworkopen.2023.20351

### Data

**Data available:** Yes

**Data types:** Deidentified participant data

**How to access data:** [lium2018@lzu.edu.cn](mailto:lium2018@lzu.edu.cn)

**When available:** With publication

### Supporting Documents

**Document types:** Statistical/analytic code

**How to access documents:** [lium2018@lzu.edu.cn](mailto:lium2018@lzu.edu.cn)

**When available:** With publication

### Additional Information

**Who can access the data:** [lium2018@lzu.edu.cn](mailto:lium2018@lzu.edu.cn)

**Types of analyses:** any purpose

**Mechanisms of data availability:** [lium2018@lzu.edu.cn](mailto:lium2018@lzu.edu.cn)
